1  
2  
3  
4  
5  
6  
7  
8  
9  
10  
11  
12  
13  
14  
15  
16  
17  
18  
19  
20  
21  
22  
23  
24  
25  
26  
27  
28  
29  
30  
31  
32  
33

# **Temporal proteomic analysis of BK polyomavirus infection reveals virus-induced G2 arrest and highly effective evasion of innate immune sensing**

Laura G. Caller<sup>†1</sup>, Colin T.R. Davies<sup>†2</sup>, Robin Antrobus<sup>2</sup>, Paul J. Lehner<sup>2</sup>, Michael P. Weekes<sup>\*2</sup>,  
Colin M. Crump<sup>\*1</sup>

<sup>1</sup>. Division of Virology, Department of Pathology, University of Cambridge, Tennis Court Road, Cambridge, CB2 1QP, UK

<sup>2</sup>. Cambridge Institute for Medical Research, Wellcome Trust MRC Building, Addenbrooke's Hospital, Hills Rd, Cambridge, CB2 0QQ, UK

<sup>†</sup> These authors contributed equally to this work

<sup>\*</sup> Corresponding authors: mpw1001@cam.ac.uk; cmc56@cam.ac.uk

34 **Abstract**

35 BK polyomavirus (BKPyV) is known to cause severe morbidity in renal transplant recipients and  
36 can lead to graft rejection. The simple 5.2 kilobase pair dsDNA genome expresses just seven known  
37 proteins, thus it relies heavily on host machinery to replicate. How the host proteome changes over  
38 the course of infection is key to understanding this host:virus interplay. Here for the first time  
39 quantitative temporal viromics has been used to quantify global changes in >9,000 host proteins in  
40 two types of primary human epithelial cell throughout 72 hours of BKPyV infection. These data  
41 demonstrate the importance both of cell cycle progression and pseudo-G2 arrest in effective BKPyV  
42 replication, along with a surprising lack of innate immune response throughout the whole virus  
43 replication cycle. BKPyV thus evades pathogen recognition to prevent activation of innate immune  
44 responses in a sophisticated manner.

45

## 46 **Introduction**

47 BK Polyomavirus (BKPyV) is a small, non-enveloped, double stranded DNA virus that was first  
48 identified in 1971 (Gardner et al. 1971). As a ubiquitous pathogen, it establishes a life-long persistent  
49 infection in the kidneys of most humans (Viscidi et al. 2011). While infection with BKPyV is  
50 subclinical in the vast majority of individuals, it is a significant cause of morbidity in the  
51 immunosuppressed, in particular kidney and haematopoietic stem cell transplants (HSCT)  
52 recipients. Polyomavirus associated nephropathy (PVAN) affects ~8% of kidney transplant patients,  
53 however treatment is currently limited to a reduction in immune suppression. Only a small number  
54 of anti-BKPyV drugs are available, all exhibiting significant nephrotoxicity, leading to graft decline  
55 of function and loss in ~85% of PVAN sufferers (Huang et al. 2015). In up to 15% of HSCT patients,  
56 BKPyV leads to haemorrhagic cystitis (HC) and severely reduced rates of HSCT recovery (Arthur  
57 et al. 1986).

58 As with all polyomaviruses, BKPyV is structurally simple. The dsDNA genome is ~5.2 kilobase  
59 pairs long and encodes seven proteins, three of which form the virus capsid (VP1, VP2 and VP3).  
60 The four non-structural proteins (large T antigen (LTAg), small T antigen (stAg), truncTAg and  
61 agnoprotein) have numerous functions and interact with multiple host factors. For example, LTAg  
62 binds members of the Retinoblastoma protein family, inhibiting their regulation of the G1/S phase  
63 checkpoint of the cell cycle. As a result, viral infection stimulates cell cycle progression into S phase,  
64 facilitating viral DNA genome replication (Harris et al. 1996, Stubdal et al. 1997). LTAg also binds  
65 p53, altering the regulation of both apoptosis and cell cycle progression (Lilyestrom et al. 2006).  
66 stAg modulates the phosphorylation of >300 cell cycle proteins and LTAg, through interaction with  
67 protein phosphatase 2A (Pallas et al. 1990, Scheidtmann et al. 1991). The role of agnoprotein is less  
68 well understood, although a wide range of activities have been proposed including action as a  
69 viroporin, enhancing viral DNA replication through interaction with the processivity factor  
70 proliferating cell nuclear antigen (PCNA), and enhancing egress of virions from the nucleus (Saribas  
71 et al. 2016, Panou et al. 2018).

72 The limited coding capacity of BKPyV necessitates co-option of multiple host factors in order to  
73 replicate and persist. Previous studies investigating how BKPyV infection modulates the host cell  
74 environment have primarily been conducted at the level of the transcriptome, which may not be  
75 reflected in the proteome. Infection in primary Renal Proximal Tubule Epithelial (RPTE) and  
76 Human Umbilical Vein Endothelial (HUV-EC) cells has been studied, either using microarray  
77 (Abend et al. 2010, Grinde et al. 2007) or RNAseq (Assetta et al. 2016, An et al. 2019). Such  
78 analyses do not provide information about virus-induced changes to cellular proteins. To date there  
79 has only been one limited analysis of changes to the host cell proteome in BKPyV infection, where

80 stable isotope labelling with amino acids in cell culture (SILAC) was used to quantify protein  
81 changes in nuclei isolated from primary RPTE cells at 3 days post infection. In this study ~2000  
82 proteins were quantified, and the effect of infection on proteins outside the nucleus could not be  
83 assessed (Justice et al. 2015).

84 To gain a comprehensive global understanding of changes in host and viral proteins throughout the  
85 whole course of BKPyV infection, we conducted a 10-plex quantitative temporal viromic analysis  
86 (QTV) of two independent BKPyV-permissive primary human cell types, RPTE and human  
87 urothelial (HU) cells. QTV uses tandem mass tags (TMT) and MS3 mass spectrometry to quantify  
88 the relative abundance of proteins throughout the whole time course of infection (Weekes et al.  
89 2014). These data have provided the first systematic global analysis of proteome changes caused by  
90 BKPyV infection, which has highlighted a specialised form of cell cycle arrest that is induced by  
91 this virus in primary cells. In addition, we have uncovered a complete lack of induction of innate  
92 immune responses at the protein level in BKPyV infected cells suggesting that this virus has evolved  
93 a sophisticated mechanism for evading pathogen recognition.

94



## 95 **Results**

### 96 **Quantitative Temporal Viromic analysis of BKPyV infection**

97 To build a global picture of changes in host and viral proteins throughout the course of BKPyV  
98 infection, we infected primary renal (RPTE) and bladder (HU) epithelial cells with BKPyV Dunlop  
99 strain. We first used 10-plex TMT and MS3 mass spectrometry to quantify changes in protein  
100 expression over three key time points of infection spanning the single-step replication cycle of this  
101 virus (0-72 hours) (Experiment 1; **Figure 1A, Figure S1A**). Cells were infected at a multiplicity of  
102 infection (MOI) of 5 infectious units per cell ensuring greater than 90% infection in both RPTE and  
103 HU cells (**Figure S1B**). In total 8985 cellular and 5/7 viral proteins were quantified in both cell  
104 lines, providing an unparalleled global view of changes in protein expression during infection in  
105 primary human epithelial cells from the kidney and bladder. Data from all proteomic experiments  
106 in this study are shown in **Table S1**. Here, the worksheet “Plots” is interactive, enabling generation  
107 of graphs of protein expression of any of the human and viral proteins quantified.

108 In uninfected cells, RPTE and HU cells exhibit differential expression of proteins, as expected from  
109 two different cell types (**Figure S2A**). In infected cells, few changes occurred by 24 h of infection,  
110 however more substantial differences were seen by 48 and 72 h (**Figure 1B-C**). In RPTE cells 191  
111 cellular proteins increased >2-fold, while 149 proteins decreased >2-fold at any time point during  
112 BKPyV infection. In HU cells 130 proteins increased >2-fold and 55 decreased >2-fold. Many  
113 proteins showed similar changes in both cell types, although cell type-specific effects were also seen  
114 (**Figure S2**). We reasoned that those protein changes which were important for viral replication  
115 would be common to different cell types. By combining the two datasets, we found that just 86  
116 cellular proteins, less than 1% of all proteins quantified, were upregulated >2-fold in both RPTE and  
117 HU cell lines (**Figure 1D**).

118

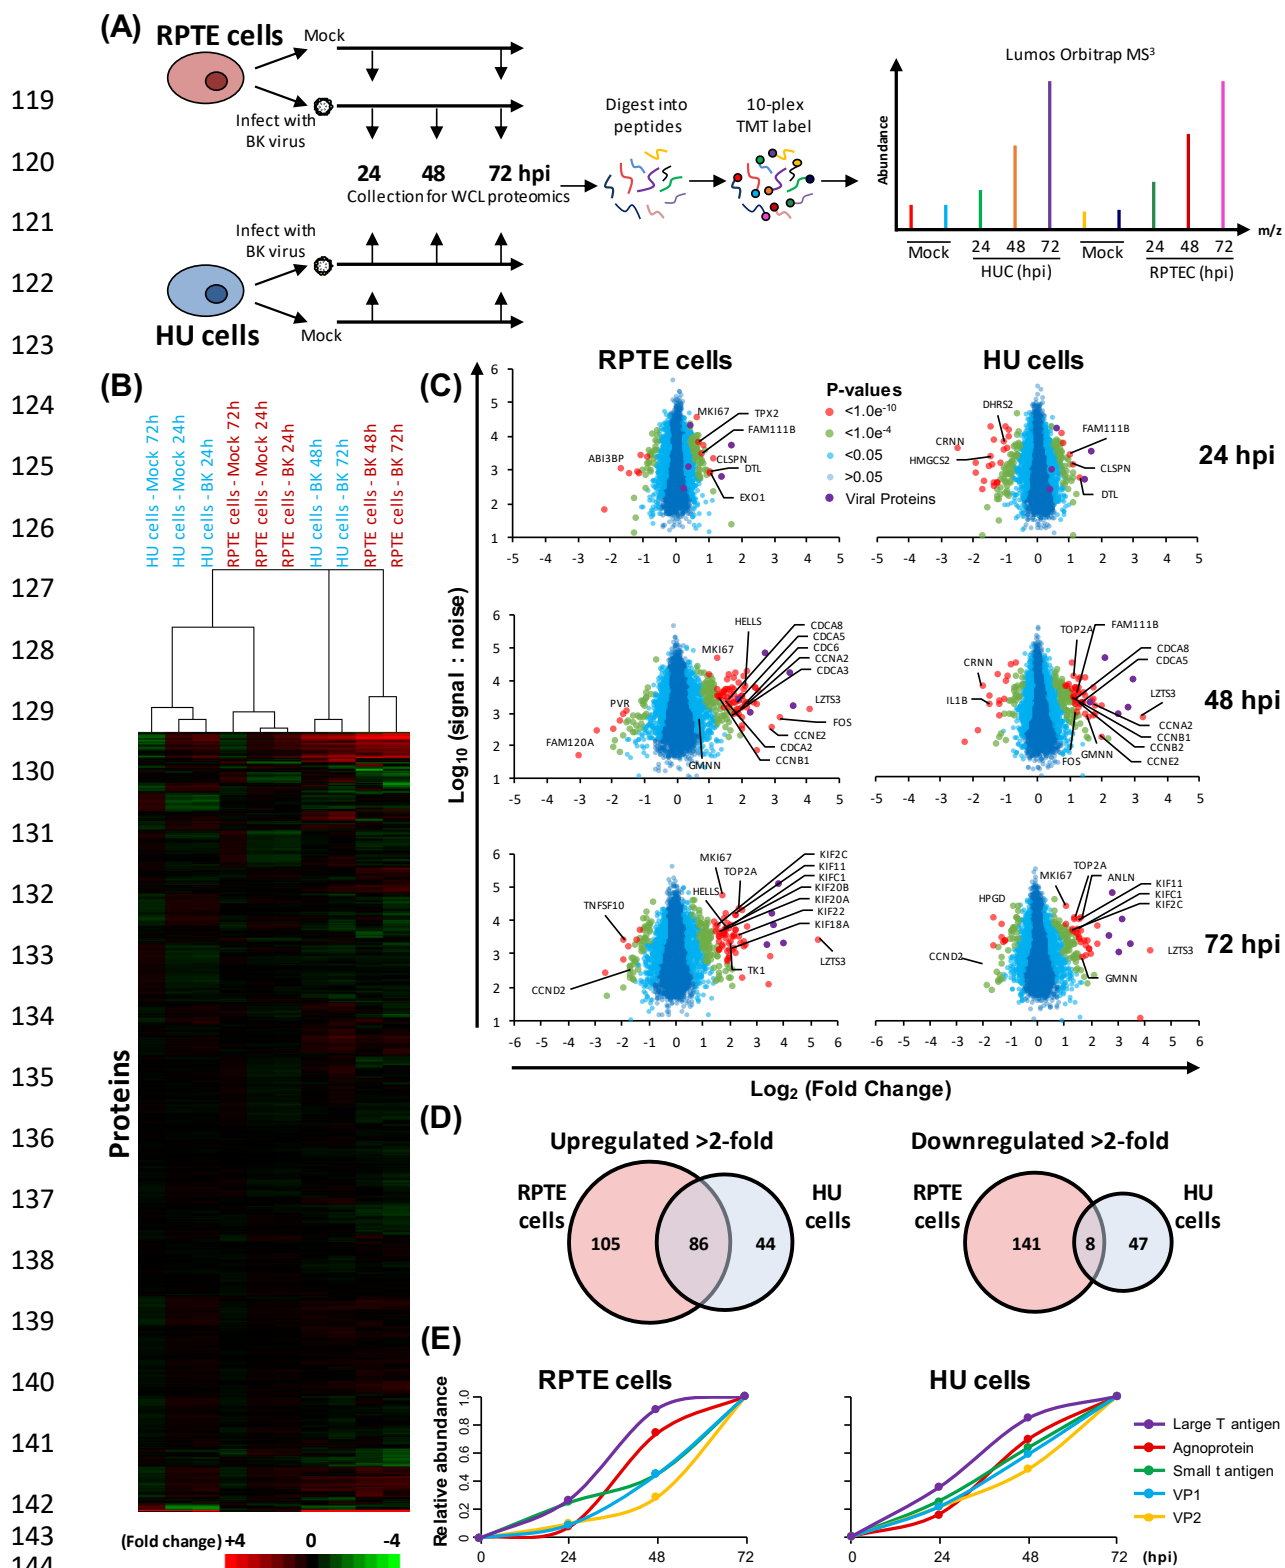

**Figure 1. Quantitative temporal analysis of BK virus lytic infection.**

- (A) Schematic of experimental workflow. RPTE and HU cells were infected at MOI 5 or mock infected. Whole cell lysates (WCL) were harvested at 24, 48, and 72 h (infected samples) or 24 and 72 h (mock infected samples).
- (B) Hierarchical cluster analysis of all quantified proteins.
- (C) Scatter plots of all proteins quantified at 24, 48 and 72 hpi in RPTE and HU cells. Fold change is shown in comparison to the average corresponding mock. Benjamini-Hochberg-corrected significance B was used to estimate p-values (Cox and Mann 2008).
- (D) Overlap of protein changes between RPTE and HU cells.
- (E) Temporal profiles of the 5 viral proteins identified, normalised to a maximum of one.

156 The lack of change in the host cell proteome at the earliest time point of 24 hpi suggested little or  
157 no effect of virus binding and penetration. To investigate this further a second TMT-based whole  
158 cell proteomics experiment (Experiment 2) was conducted repeating 24 and 48 hpi timepoints with  
159 an additional earlier 12 hpi timepoint, where RPTE cells were infected with UV-inactivated or  
160 unmodified BKPyV at MOI 5 (**Figures S3, S4**). Very few changes in protein abundance were  
161 observed at 12 or 24 hpi during infection with unmodified BKPyV, while at 48 hpi cellular proteins  
162 upregulated were similar to those observed in the first experiment at the same time point (**Figures**  
163 **S3B-D**). UV-inactivated virus induced virtually no changes at any time point, suggesting that virus  
164 replication is necessary to cause the observed changes in host protein abundance (**Figure S3B**).

### 165 **Temporal Analysis of BK Polyomavirus Protein Expression**

166 Expression of the early BKPyV proteins, LTA<sub>g</sub> and stA<sub>g</sub>, was observed from 24 hpi, closely  
167 followed by late proteins, agnoprotein, VP1 and VP2. Profiles from HU and RPTE cells (both  
168 experiments) corresponded well (**Figures 1E, S3E**). We were unable to assign peptides to VP3 due  
169 to its 100% sequence identity with the C terminus of VP2, and the single unique peptide  
170 corresponding to the extreme N-terminus of VP3 was not quantified. Likewise, TruncTA<sub>g</sub> was not  
171 identified due to its similarity to full length LTA<sub>g</sub>: the only difference in protein sequence are the  
172 C-terminal 3 amino acids of TruncTA<sub>g</sub>, which directly follow a cluster of lysine and arginine  
173 residues and so would not be expected to be identified by our mass spectrometry analysis.

### 174 **BKPyV does not cause induction of innate immune responses in infected RPTE cells**

175 One surprising observation from our QTV analyses was an apparent lack of an innate immune  
176 response to BKPyV infection. Of the 131 quantified proteins with annotated innate immune  
177 functions or the 69 quantified proteins with annotated antiviral functions only five were up- or  
178 downregulated 2-fold, and these changes were not consistent between the two independent cell lines  
179 or experiments (**Figure 2A and Table S2**). Despite RPTE cells being capable of mounting a  
180 response to type I interferon (**Figure 2C**), the expression of the well-established interferon  
181 stimulated genes MX1, ISG15, IFIT1, IFIT2, IFIT3, IRF3, IFI16, and BST2 remained unchanged  
182 upon BKPyV infection throughout the time course as assessed both by proteomics and immunoblot  
183 (**Figure 2B-C**). This was unexpected given that by 72 hpi large amounts of viral DNA and proteins  
184 as well as progeny virions were present within cells. This complete lack of response suggests  
185 BKPyV has evolved a highly effective immune-evasion activity, which could be due to either viral  
186 DNA and proteins not being recognised by host pathogen recognition receptors (PRRs) in these  
187 primary epithelial cells, or a potent suppression of PRR signalling pathways during BKPyV  
188 infection.

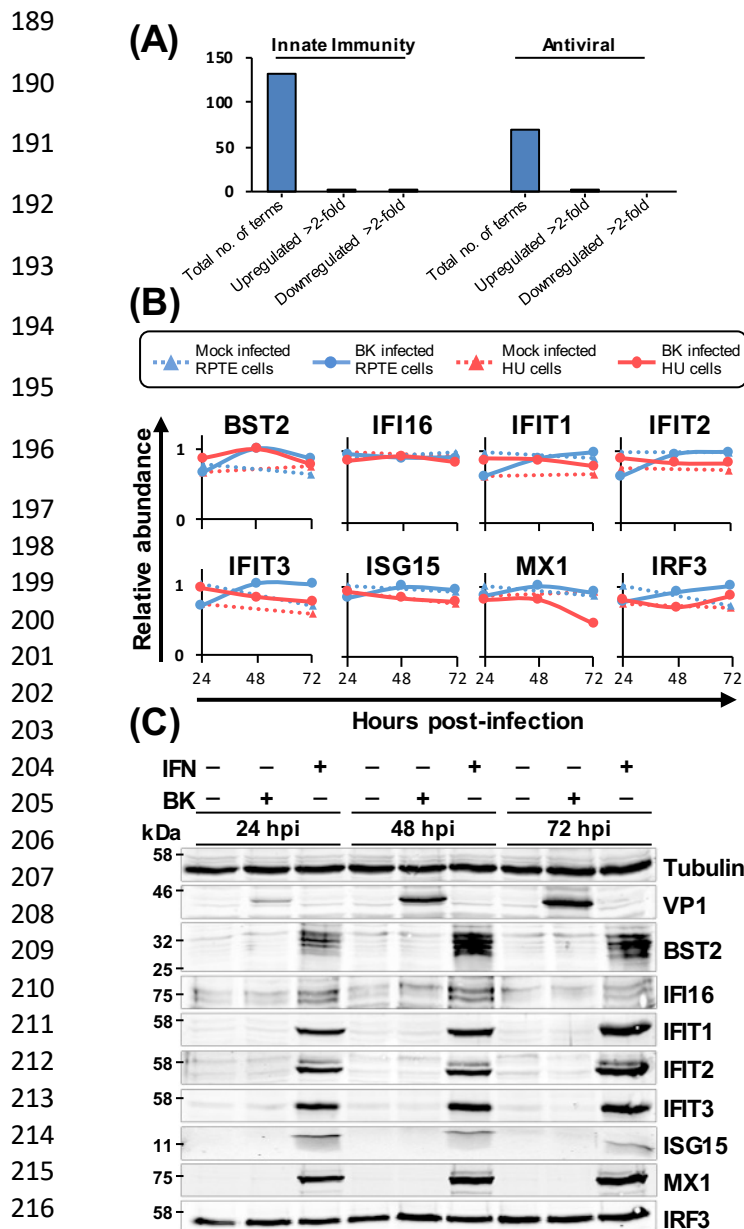

220 **Figure 2. Proteins involved in the innate antiviral immune response remain unchanged during BKPyV infection.**

- 221 (A) Up- or down-regulation of a minority of proteins with innate antiviral function (Uniprot keywords: ‘Innate  
222 immunity’ and ‘Antiviral’).  
223 (B) Example protein profiles from (A).  
224 (C) Validation of temporal profiles shown in (B) by immunoblot (RPTE cells, MOI 3). Stimulation with IFN $\alpha$ 2A  
225 ( $10^4$  U/mL) was as a positive control for innate immune response induction.  
226

227 Activation of RNA and DNA sensors invariably leads to IRF3 phosphorylation and translocation  
228 into the nucleus, leading to transcription of type I and III interferons. We analysed whether RPTE  
229 cells have functional RNA and DNA sensing pathways, and whether these were activated in  
230 response to BKPyV infection. The phosphorylation and localisation of IRF3 was investigated by  
231 Western blot and immunofluorescence microscopy following BKPyV infection or treatment with  
232 Poly I:C or stimulatory DNA. Poly I:C or stimulatory DNA caused clear nuclear translocation of  
233 IRF3 in RPTE cells, with poly I:C having the greatest effect (**Figure 3A**). However, BKPyV-

234 infected RPTE cells had no detectable change in IRF3 localisation and appeared no different to mock  
 235 infected cells apart from characteristic enlarged nuclei in virus infected cells (**Figure 3A**).  
 236 Furthermore, Western blot analysis showed no stimulation of IRF3 phosphorylation in BKPyV-  
 237 infected RPTE cells, whereas both poly I:C and stimulatory DNA transfection caused robust IRF3  
 238 phosphorylation (**Figure 3B**). These results suggest that signal transduction pathways that would  
 239 usually lead to activation of IRF3-specific kinases are not activated in infected cells either due to an  
 240 inability to sense BKPyV nucleic acids or due to active inhibition by BKPyV.

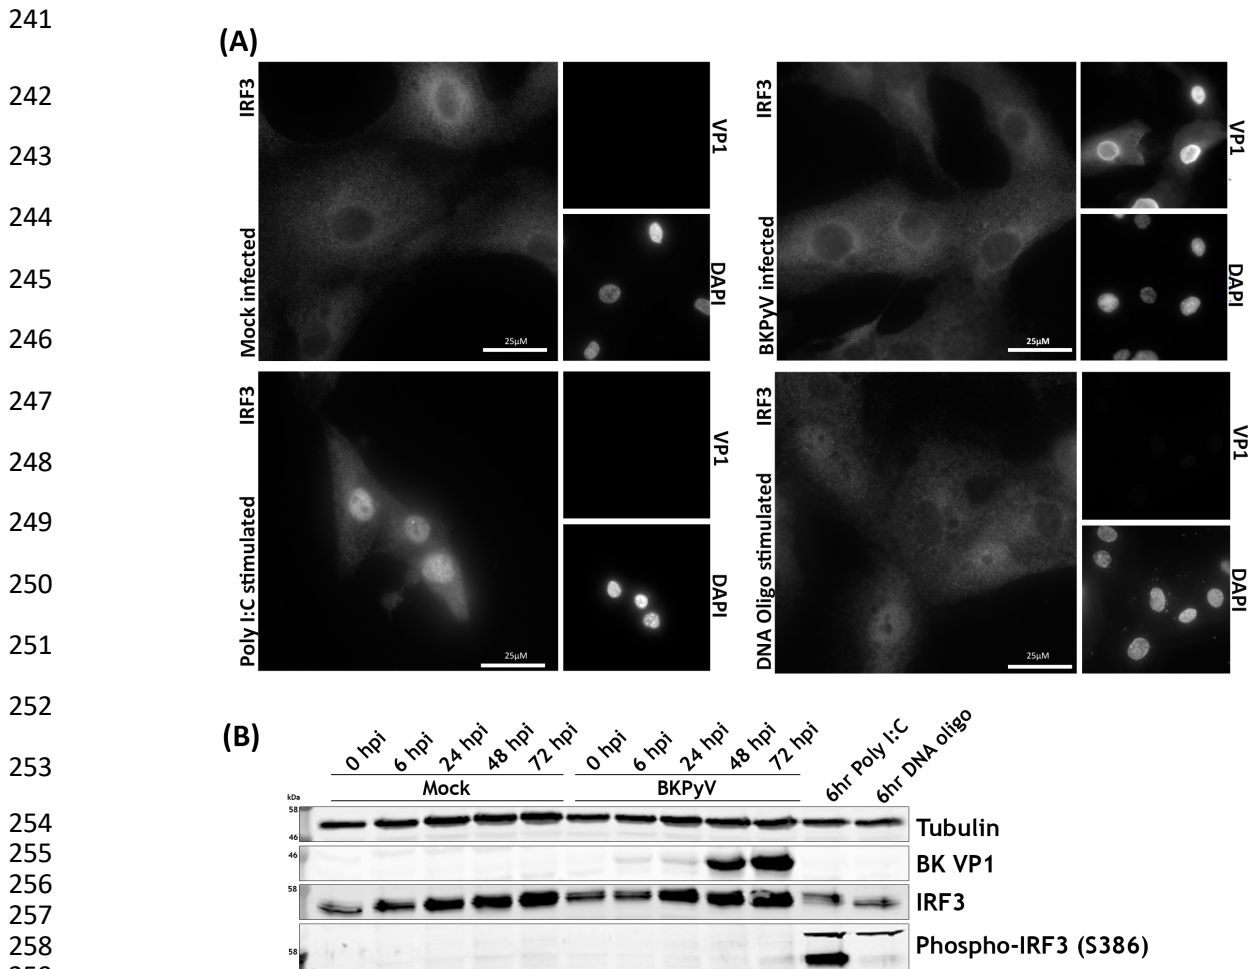

261 **Figure 3. RPTE cells phosphorylate and translocate IRF3 in response to cytoplasmic RNA and DNA but fail to**  
 262 **do so upon BKPyV infection.**

263 (A) IRF3 localisation changes upon stimulation determined by immunofluorescence microscopy. RPTE cells  
 264 infected with BKPyV (MOI 0.5) or mock infected were either fixed at 48 hpi or stimulated with Poly I:C (2  
 265  $\mu\text{g/mL}$ ) or stimulatory DNA (2  $\mu\text{g/mL}$ ) and fixed at 6 h after stimulation. DAPI was used as a nuclear marker  
 266 and anti-VP1 as a marker of infection.

267 (B) Analysis of IRF3 activation by phosphorylation shown by immunoblot. RPTE cells infected with BKPyV (MOI  
 268 3) or mock infected were either fixed at 48 hpi or stimulated with Poly I:C (2  $\mu\text{g/mL}$ ) or stimulatory DNA (2  
 269  $\mu\text{g/mL}$ ) and fixed at 6 h after stimulation.

270



271 To investigate whether the lack of viral sensing is due to evasion of nucleic acid detection or active  
 272 suppression of IRF3 phosphorylation, RPTE cells were mock or BKPyV-infected and subsequently  
 273 stimulated with Poly I:C or stimulatory DNA at 42 hpi, prior to analysis at 48 hpi. Nuclear  
 274 translocation and robust phosphorylation of IRF3 was observed in response to both RNA and DNA,  
 275 irrespective of whether the cells were infected with BKPyV or mock-infected (**Figures 4A-B**). This  
 276 suggests that BKPyV does not actively inhibit nucleic acid sensing pathways, IRF3 phosphorylation  
 277 or IRF3 nuclear translocation. As BKPyV does not inhibit downstream activation of RNA or DNA  
 278 sensing pathways this suggests BKPyV evades nucleic acid and other pathogen associated molecular  
 279 pattern (PAMP) sensing pathways altogether, despite high concentrations of viral DNA, RNA and  
 280 protein within these primary renal epithelial cells.

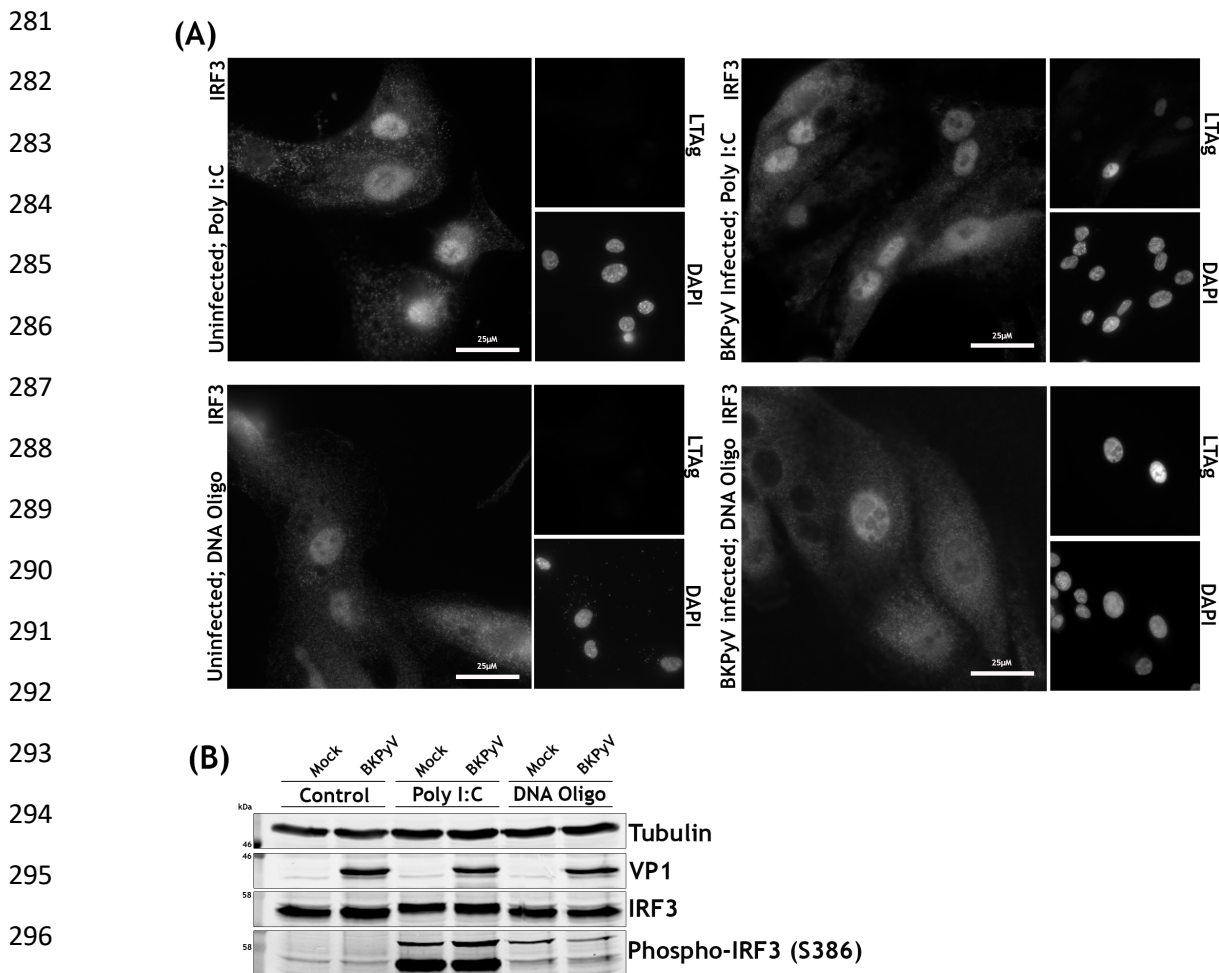

299 **Figure 4. BKPyV and mock-infected RPTE cells do not differ in their responses to cytoplasmic RNA and DNA.**

300 (A) IRF3 localisation changes upon infection followed by stimulation determined by immunofluorescence. RPTE  
 301 cells infected with BKPyV (MOI 0.5) or mock infected at 42 hpi were stimulated with Poly I:C (2 µg/mL) or  
 302 oligomeric DNA (2 µg/mL) and fixed at 48 hpi. DAPI was used as a nuclear marker and anti-LTAag as a marker  
 303 of infection.

304 (B) Analysis of IRF3 activation by phosphorylation shown by immunoblot. RPTE cells infected with BKPyV (MOI  
 305 3) or mock infected at 42 hpi were stimulated with Poly I:C (2 µg/mL) or oligomeric DNA (2 µg/mL) and fixed  
 306 at 48 hpi .

307

## 308 **Cell cycle associated proteins are the primary target of BKPyV**

309 To investigate host cell functions that were modified by BKPyV, the Database for Annotation,  
310 Visualisation and Integrate Discovery (DAVID) was used to identify pathways enriched among  
311 proteins up- or downregulated during BKPyV infection (Huang et al. 2009). Amongst upregulated  
312 proteins, similar terms were enriched between HU and RPTE cells (both from experiments 1 and 2).  
313 ‘Cell cycle’ and terms related to the cell cycle dominated this analysis (**Figures 5A, S4B, Tables**  
314 **S3, S4**). Terms associated with the G2/M phase of the cell cycle were particularly enriched,  
315 including: chromosome, microtubule, spindle, sister chromatid cohesion and DNA damage.

316 G2/M phase arrest has previously been observed in a number of different polyomavirus infections  
317 (Hornikova et al. 2017, Porras et al. 1999, Hesbacher et al. 2016, Orba et al. 2010). Cellular proteins  
318 associated with G2/M phase of the cell cycle generally increased in abundance throughout BKPyV  
319 infection including: M-phase (CDCA3), spindle formation (CDC20, CDCA2), kinetochore  
320 assembly, sister chromatid segregation and cytokinesis (KIF11, CENPK, SKA1, KIF22, ANLN),  
321 DNA repair and control of re-replication (HELLS, GMNN) and G2/M-associated cyclins and cyclin-  
322 dependent kinases (CDK1, cyclin A2 and cyclin B1) (**Figure 5B**). Proteins associated with the G1  
323 phase, such as cyclin D2, were observed to decrease in abundance. As expected, levels of the tumour  
324 suppressor p53 were elevated during BKPyV infection; polyomavirus LTA<sub>g</sub> has a well-established  
325 function that binds, stabilises and inactivates p53 (Papadimitriou et al. 2016, Harris et al. 1996).  
326 Interestingly, MDM2, the ubiquitin ligase that normally mediates p53 degradation, was depleted  
327 during BKPyV infection (**Figure 5B**).

328 We confirmed these results for a number of cell cycle regulatory proteins by immunoblot throughout  
329 the time course of BKPyV infection in both RPTE and HU cells (**Figure 5B-C**).  
330 Immunofluorescence microscopy of BKPyV or mock-infected RPTE cells further confirmed the  
331 increase in cyclin B1 and CDK1 during BKPyV infection. (**Figure S5**). Furthermore, cyclin B1  
332 remained largely cytoplasmic during BKPyV infection, suggesting that infected cells do not proceed  
333 into M phase, when cyclin B1 would normally relocalise to the nucleus (Pines and Hunter 1991).

334

335

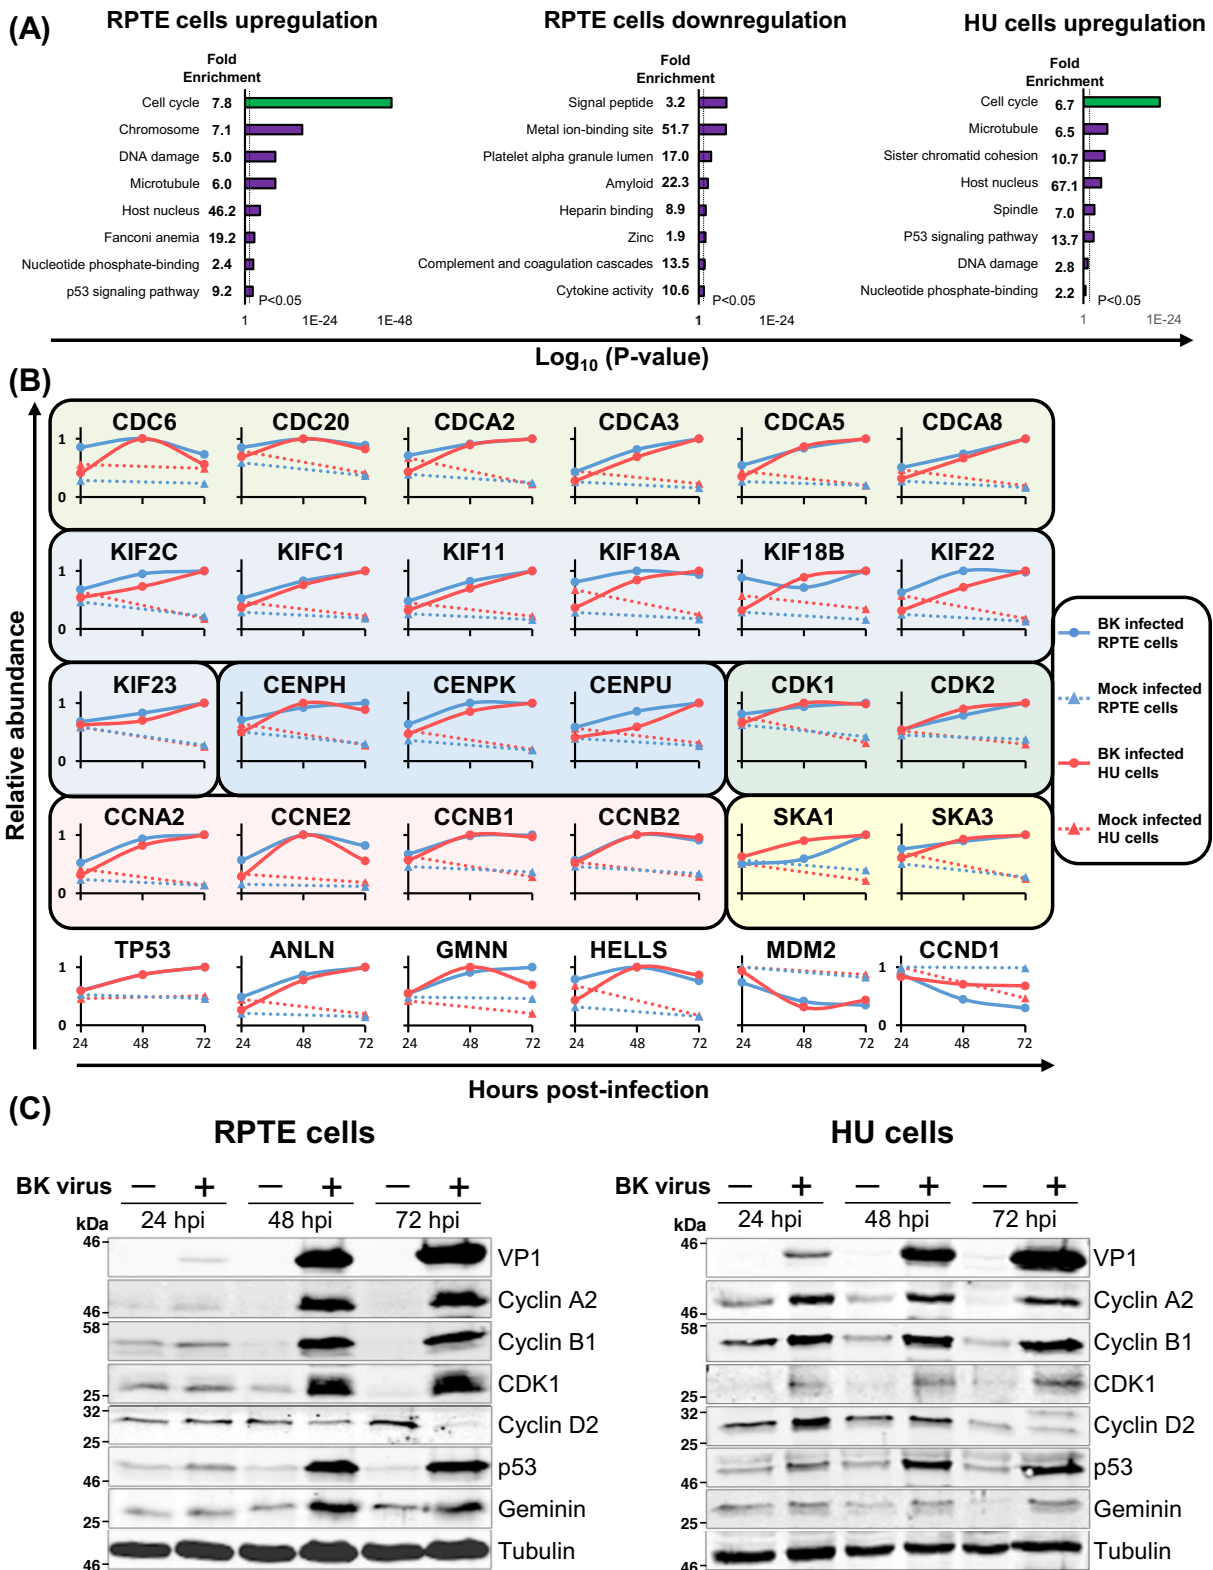

**Figure 5. Upregulated proteins are enriched in cell cycle functions.**

(A) DAVID enrichment analysis of proteins upregulated or downregulated >2-fold against a background of all 8985 human proteins quantified. No significantly enriched clusters were seen in downregulated clusters in HU cells.

(B) Example protein profiles from the cell cycle clusters enriched in both RPTE and HU cells. Proteins families are separated by coloured boxes.

(C) Validation of temporal profiles shown in (B) by immunoblot (RPTE cells, MOI 3). Tubulin was used as a loading control and VP1 as a control for infection.

336  
337  
338  
339  
340  
341  
342  
343  
344  
345



## 346 **MDM2 and p53 levels are modulated by LTA<sub>g</sub> and cell cycle arrest**

347 BKPyV-induced upregulation of p53 and downregulation of MDM2 was also confirmed by  
348 immunofluorescence (**Figures 6, S6**). The E3 ubiquitin ligase MDM2 is a negative regulator of both  
349 p53 and itself, leading to ubiquitinylation and degradation of p53 and MDM2 (Barak et al. 1993).  
350 In addition, p53 is a transcription factor for both itself and MDM2 (Wei et al. 2006), whose  
351 transcriptional activity is governed by the strength of extracellular and intracellular signals, such as  
352 cell cycle checkpoints, leading to the establishment of both positive and negative feedback loops  
353 (Boehme and Blattner 2009).

354 Polyomavirus LTA<sub>g</sub>s are well established to efficiently bind, stabilise and inhibit p53 (Sheppard et  
355 al. 1999), leading to increased p53 levels in BKPyV infected cells. Our data now demonstrates for  
356 the first time that this is accompanied by a decrease in MDM2 levels. Interplay between BKPyV  
357 infection, MDM2 and p53 was investigated using the MDM2 inhibitor Nutlin-3. Nutlin-3 occupies  
358 the p53 binding pocket on MDM2 obstructing their interaction and leading to reduced p53  
359 ubiquitinylation. In addition, Nutlin-3 leads to increased transcription of MDM2 due to the release  
360 of active p53 (Vassilev et al. 2004). Mock or BKPyV infected RPTE cells were treated with Nutlin-  
361 3 at 2 hpi, or DMSO as a control, and fixed at 48 hpi. Cells were immunostained for expression of  
362 MDM2, p53, and LTA<sub>g</sub> (infection marker) (**Figure 6A**). Low endogenous levels of both MDM2  
363 and p53 were observed in the nuclei of untreated mock infected cells. BKPyV infection lead to a  
364 reduction in MDM2, while p53 substantially increased, correlating with the changes observed in the  
365 proteomics data. Mock infected cells treated with Nutin-3 showed increased levels of MDM2,  
366 accompanied by a slight increase in p53 levels, in accordance with published effects of Nutlin-3  
367 (Vassilev et al. 2004). Interestingly, MDM2 levels did not increase in BKPyV infected cells treated  
368 with Nutlin-3 and in fact MDM2 levels were observed to reduce, whilst p53 levels were once again  
369 substantially increased. This suggests that during infection MDM2 remains able to self-  
370 ubiquitinylate, leading to its degradation in the presence of Nutlin-3, however transcription of  
371 MDM2 by p53 is apparently inhibited, likely due to p53 sequestration by LTA<sub>g</sub>.

372 RPTE cells were transfected with LTA<sub>g</sub> to investigate whether LTA<sub>g</sub> expression alone was  
373 sufficient to cause the observed MDM2 decrease and p53 increase. At 2 h cells were treated with  
374 Nutlin-3 or DMSO and then in addition some samples were treated at 24 h with a CDK1-specific  
375 inhibitor, RO-3306, to simulate BKPyV induced cell cycle arrest. Cells were fixed at 48 h and  
376 immunostained for MDM2, p53, and LTA<sub>g</sub> (**Figure 6B**). Transfection of LTA<sub>g</sub> alone was sufficient  
377 to reduce MDM2 levels, however p53 levels were increased only slightly suggesting other effects  
378 of BKPyV infection in addition to LTA<sub>g</sub> expression modulate p53 and MDM2 levels. Nutlin-3  
379 treatment did not alter the effects of LTA<sub>g</sub> on MDM2 or p53 levels. Treatment of LTA<sub>g</sub> transfected

380 cells with the CDK1 inhibitor RO-3306 lead to a marked increase in p53 expression, while MDM2  
381 levels were once again decreased. Combined Nutlin-3 and RO-3306 treatment further enhanced the  
382 increase of p53 in LTA<sub>g</sub> expressing cells. Taken together, these data suggest LTA<sub>g</sub> binding to p53  
383 displaces MDM2 leading to p53 stabilisation and MDM2 degradation, but LTA<sub>g</sub> binding also  
384 prevents p53-dependent expression of MDM2 and p53. Furthermore, virus infection or G2/M arrest  
385 stimulates p53 expression, possibly via a DNA damage-type response.

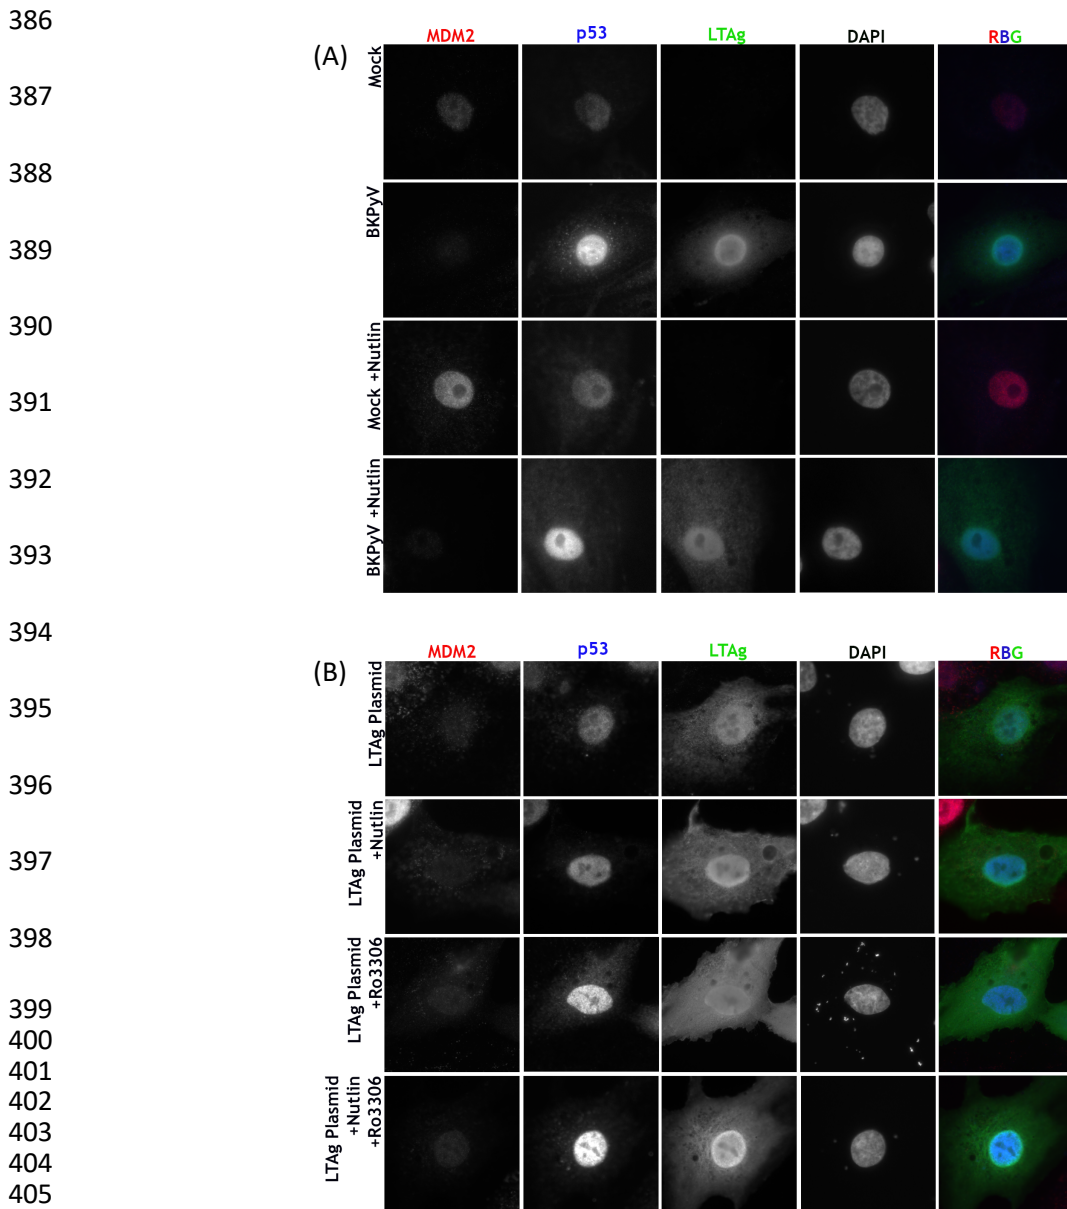

409 **Figure 6. MDM2 and p53 are modulated by BKPyV via LTA<sub>g</sub>-dependent and -independent activities.**

410 (A) Expression of MDM2, p53 and LTA<sub>g</sub> in RPTE cells infected with BKPyV (MOI 1) or mock infected, then  
411 treated with 5 μM Nutlin-3 or DMSO as a control at 2 hpi, fixed at 48 hpi. DAPI was used as a nuclear marker.  
412 Select images shown, additional images provided in Figure S6.

413 (B) Expression of MDM2, p53 and LTA<sub>g</sub> in RPTE cells transfected with BKPyV LTA<sub>g</sub>, then treated with 5 μM  
414 Nutlin-3 or DMSO as a control at 2 h and subjected to cell cycle inhibition (RO-3306 5 μM) at 24 h, fixed at  
415 48 hpi. DAPI was used as a nuclear marker. Select images shown, additional images provided in Figure S6.

416

417 **BKPyV induced G2/M phase arrest is prevented by inhibition of CDK1 & CDK2, but not by**  
418 **inhibition of CDK1 alone or CDK4 & CDK6**

419 Given the striking dysregulation of cell cycle-related proteins during BKPyV replication, we  
420 postulated that BK-induced pseudo-G2 phase may serve a number of roles in BKPyV replication.  
421 We therefore investigated the effect of BKPyV infection on the host cell cycle status in the presence  
422 or absence of various CDK inhibitors. Polyomavirus replication is heavily reliant on the host DNA  
423 synthesis machinery and it has previously been shown that either BKPyV infection or JCPyV LTA $\gamma$   
424 expression alone can cause cells to arrest in the G2/M phase of the cell cycle (Jiang et al. 2012,  
425 Verhalen et al. 2015, Orba et al. 2010). However, the impact of CDK inhibitors on BKPyV-induced  
426 arrest has not been fully investigated. RPTE cells were infected with BKPyV, treated with CDK  
427 inhibitors after 24 hpi to allow sufficient time for virus entry and initiation of early gene expression,  
428 then subsequently harvested at 48 hpi and analysed by flow cytometry to compare cell cycle profiles.  
429 PD0332991 was used to inhibit CDK4 and 6, which are active in G1 phase, Roscovitine was used  
430 to inhibit CDK1 and 2, which are active throughout S, G2, and M phase, and RO-3306 was used to  
431 inhibit CDK1, which is active in G2 and M phase. In mock-infected RPTE cells, all three inhibitors  
432 produced the expected effects: increased G1 for PD0332991; increase G2/M for RO-3306; no  
433 change for Roscovitine (**Figure 7**). Infection of RPTE cells with BKPyV in the absence of any  
434 inhibitor increased the proportion of cells in G2/M and S phases from ~28% (mock) to ~42%  
435 (BKPyV), consistent with previous published data (Jiang et al. 2012). BKPyV-infected cells that  
436 were treated with PD0332991 showed a slight increase in the proportion of cells in G1 and S phases  
437 compared to control infected cells, although these samples still showed substantially more cells in  
438 G2/M than uninfected cells. This suggests that inhibition of CDK4 and 6 does not prevent BKPyV  
439 driving infected cells through the G1/S checkpoint, due to Rb inactivation by LTA $\gamma$ , or arresting  
440 cells in G2/M. In contrast, treatment of infected cells with Roscovitine, which inhibits both CDK1  
441 and 2, appear to severely restrict BKPyV-stimulated S phase entry and G2/M arrest, as the cell cycle  
442 status was similar to that of mock-infected cells with >72% of cells in G1, ~8% in S phase, and  
443 ~19% in G2/M phase (**Figure 7A**). Infected cells treated with RO-3306 (CDK1 inhibitor) showed a  
444 similar cell cycle profile to that of control-treated infected cells, (**Figure 7A**). This suggests that  
445 inhibition of CDK1 alone does not affect the ability of BKPyV to induce progression through S  
446 phase and subsequent G2/M arrest, and further that BKPyV infection and CDK1 inhibition have  
447 similar effects on the cell cycle, namely inducing a G2/M arrest.

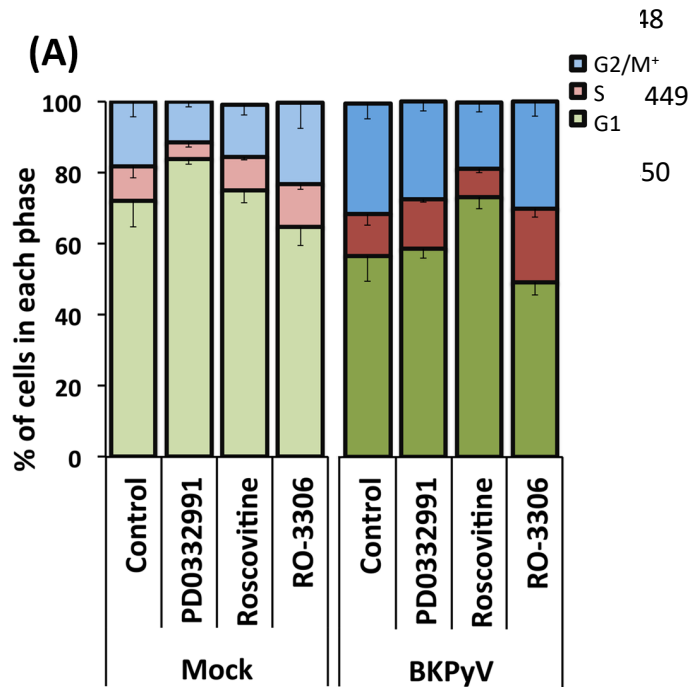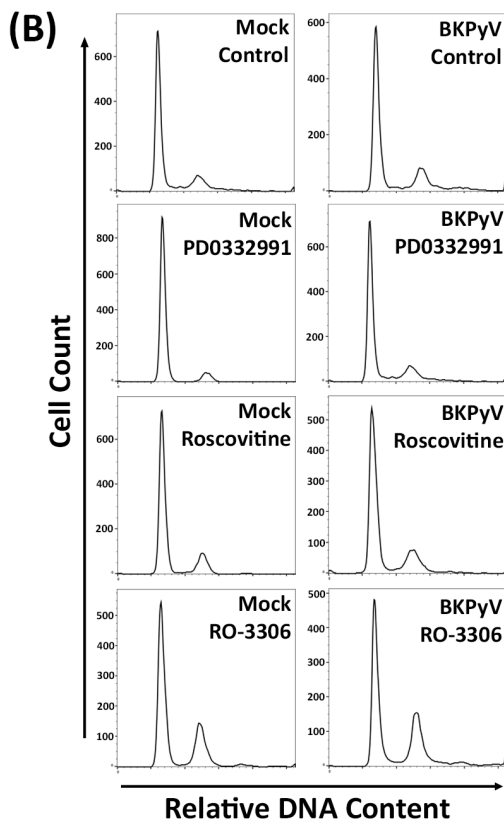

477

**Figure 7. Cell cycle inhibitors have variable effects on BKPyV induced G2/M phase cell cycle arrest.**

478  
 479 (A) The cell cycle status of RPTE cells was determined in a number of different experimental conditions. RPTE  
 480 cells were infected with BKPyV (MOI 3) or mock infected, then subjected to CDK4/6 inhibition (PD0332991  
 481 1  $\mu$ M), CDK1/2 inhibition (Roscovitine 20  $\mu$ M) or CDK1 inhibition (RO-3306 5  $\mu$ M) at 24 hpi, and  
 482 subsequently collected for analysis at 48 hpi. Collected cells were stained with propidium iodide (PI) and  
 483 analysed by flow cytometry (n=3). Error bars represent standard deviation.

484 (B) Histograms of PI stain for each experimental condition of a single experiment shown.

485

486

## 487 **Inhibition of CDK1 and CDK2 or CDK1 alone reduces BKPyV replication**

488 The ability of BKPyV to induce a pseudo-G2 arrest in the presence of CDK1 or CDK4/6 inhibition  
489 suggested that virus replication should be unaffected in such conditions, while inhibition of CDK1/2  
490 should perturb viral replication due to inhibition of S phase progression. To investigate if this was  
491 the case we next analysed the effect of CDK inhibitors on viral genome synthesis in BKPyV infected  
492 RPTe cells. Infected cells were again treated with each inhibitor at 24 hpi and harvested at 48 hpi.  
493 Viral and host cell DNA was quantified using qPCR to determine viral DNA copy numbers per cell  
494 and were normalised to uninhibited controls (arbitrarily set to 1). Inhibition of CDK4/6 had no  
495 significant effect on viral genome synthesis, while inhibition of CDK1 and 2 by Roscovitine showed  
496 a 7.4-fold reduction in the synthesis of BKPyV genome, likely due to the restriction of cells from  
497 entering and progressing through S phase (**Figure 8A**). Surprisingly inhibition of CDK1 alone by  
498 RO-3306 also caused a significant, although more modest, 2.3-fold reduction in BKPyV genome  
499 synthesis. This suggests that, despite this inhibitor having little effect on BKPyV-driven cell cycle  
500 progression, CDK1 activity is important for efficient viral genome synthesis.

501 The effects of these CDK inhibitors on viral protein synthesis was similarly investigated (**Figure**  
502 **8B**). Inhibition of CDK4 and 6 had no observable effect on viral protein synthesis, while inhibition  
503 of CDK1 and 2 by Roscovitine substantially reduced viral protein expression levels. Inhibition of  
504 CDK1 alone by RO-3306 showed only small reductions in viral protein levels (**Figure 8B**).

505 Analysis of infectious virus production in the presence or absence of these CDK inhibitors also  
506 demonstrated a similar trend. Inhibition of CDK4 and 6 caused only a slight reduction of infectious  
507 titres, whereas inhibition of CDK1 and 2 by Roscovitine resulted in a significant 80-fold reduction  
508 of virus production, unsurprisingly given the dramatic inhibition of viral DNA and protein synthesis  
509 (**Figure 8C**). Inhibition of CDK1 alone by RO-3306 caused a significant reduction of infectious  
510 virus titre by >3-fold. These data further suggest that CDK1 activity is important for the efficient  
511 production of infectious viruses.

512

513

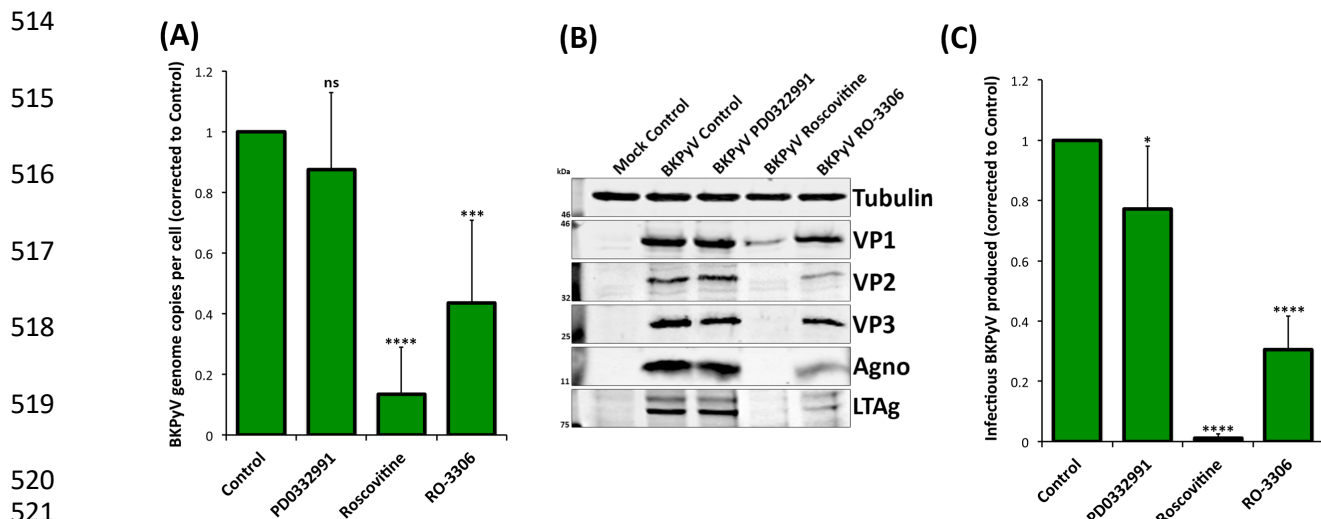

**Figure 8. CDK1 and 2 inhibitors impede BKPyV replication in RPTE cells.**

RPTE cells infected with BKPyV (MOI=3) were subjected to CDK4/6 inhibition (1  $\mu$ M PD0332991), CDK1/2 inhibition (20  $\mu$ M Roscovitine) or CDK1 inhibition (5  $\mu$ M RO-3306) from 24 hpi and harvested for analysis at 48 hpi.

(A) qPCR to determine viral DNA copy numbers per cell. DNA was extracted from each condition, BKPyV genome copy number was determined, normalised to host gene (TNF $\alpha$ ) copy number and compared to the uninhibited control, which was arbitrarily set to 1 (n=6).

(B) Expression of viral proteins VP1, VP2, VP3, Agno, and LTA g was determined by immunoblot. Tubulin was used as a loading control.

(C) Infectious BKPyV produced in each experimental condition was determined by fluorescent focus unit (FFU) assay and normalised to uninhibited control (arbitrarily set to 1) (n=7).

Error bars represent standard deviation. \*p < 0.05; \*\*\*p < 0.001; \*\*\*\*p < 0.0001; ns = not significant; one sample t-test experimental conditions versus control.

## Discussion

By employing the power and sensitivity of TMT-based MS3 mass spectrometry technology, we have been able to uncover BKPyV-induced changes to protein abundance and an unparalleled global view of protein expression within these human cell types. Importantly, these studies were conducted in primary human cells from epithelial tissue representing the natural sites of replication *in vivo*. Therefore, this work also provides a comprehensive proteomic resource for future studies on human renourinary epithelial biology.

One of the most surprising findings of this study was just how few of the ~9000 cellular proteins that were quantified changed in abundance in response to BKPyV infection. In fact, just 235 were found to be upregulated and 196 downregulated >2-fold or more across either cell line at any time point, which corresponds to <5% of the total proteome. Previous studies that applied a similar TMT-based approach to infection with human cytomegalovirus (HCMV), another dsDNA virus, revealed that 56% of cellular proteins changed in abundance more than 2-fold during the course of infection (Weekes et al. 2014). This suggests that BKPyV, and presumably other polyomaviruses, are so



552 highly adapted to their host that they only need to induce subtle changes to host gene expression to  
553 very effectively reprogram cells into virus-producing factories. This also suggests polyomaviruses  
554 can very effectively evade detection by host pathogen recognition receptors despite producing high  
555 concentrations of foreign (viral) nucleic acid and proteins seen in high multiplicity infections such  
556 as these.

557 For host proteins induced by BKPyV infection, we identified substantial overlap between the two  
558 primary cell lines, with many of the same or highly related functional clusters identified by DAVID  
559 analysis. This includes clusters such as ‘DNA damage’ and the ‘Fanconi Anaemia’ pathway, which  
560 have been previously described as important during polyomavirus replication to ensure viral genome  
561 replication maintains high fidelity (Jiang et al. 2012). Interestingly, the majority of the functional  
562 clusters identified as upregulated in BKPyV infection are related to cell cycle activity and regulation,  
563 in particular activities associated with G2 and M phases. In fact, BKPyV infection appears to have  
564 a similar ‘G2/M arrest’ effect on cell cycle status as the CDK1-specific inhibitor RO-3306, a drug  
565 commonly used to arrest cells in G2. The fact that infected cells do not progress into authentic  
566 mitosis is supported by the observation that cyclin B1 remains predominantly cytoplasmic despite  
567 higher protein levels in infected cells, and supports previously published data indicating G2/M phase  
568 arrest is driven by polyomavirus infection (Harris et al. 1996, Lilyestrom et al. 2006, Stubdal et al.  
569 1997, Rundell and Parakati 2001, Orba et al. 2010). Importantly our data provides a much greater  
570 understanding of host protein profiles that are associated with polyomavirus-induced G2 arrest, and  
571 it would be interesting to compare these observations to the effects of RO-3306 or other specific  
572 CDK1 inhibitors on cellular protein expression profiles.

573 Our data also indicate a specific perturbation of the p53-MDM2 axis by BKPyV infection, where  
574 MDM2 is destroyed and p53 is substantially increased but kept inactive by LTA<sub>g</sub> binding. However,  
575 these changes require more than just LTA<sub>g</sub> expression, and are also driven by additional effects of  
576 BKPyV infection related to G2/M arrest and potentially DNA damage responses. Our findings  
577 suggest the following model: low MDM2 and p53 levels are maintained in uninfected cells due to  
578 their poly-ubiquitinylation by MDM2 and subsequent proteosomal degradation (**Figure 9A**).  
579 Inhibition of MDM2-p53 interaction by Nutlin-3 releases p53 which then stimulates MDM2  
580 expression (**Figure 9B**). Interaction of LTA<sub>g</sub> with p53 displaces MDM2, thereby causing MDM2  
581 to be destroyed by the proteasome, and so protects p53 from degradation but inhibits p53  
582 transcriptional activity prevent induction of de novo MDM2 expression (**Figure 9C**). Therefore, the  
583 expression of just LTA<sub>g</sub> results in decreased MDM2 levels but only a modest increase in p53.  
584 During active BKPyV infection, p53 expression is induced by some other effect(s) of virus  
585 replication, and these additional copies of p53 are also bound and inactivated by LTA<sub>g</sub> (**Figure 9D**).

586 The virus induced stimulation of p53 expression is predicted to be via a DNA damage response  
 587 pathway, which can be mimicked by inducing a G2 arrest through inhibition of CDK1.

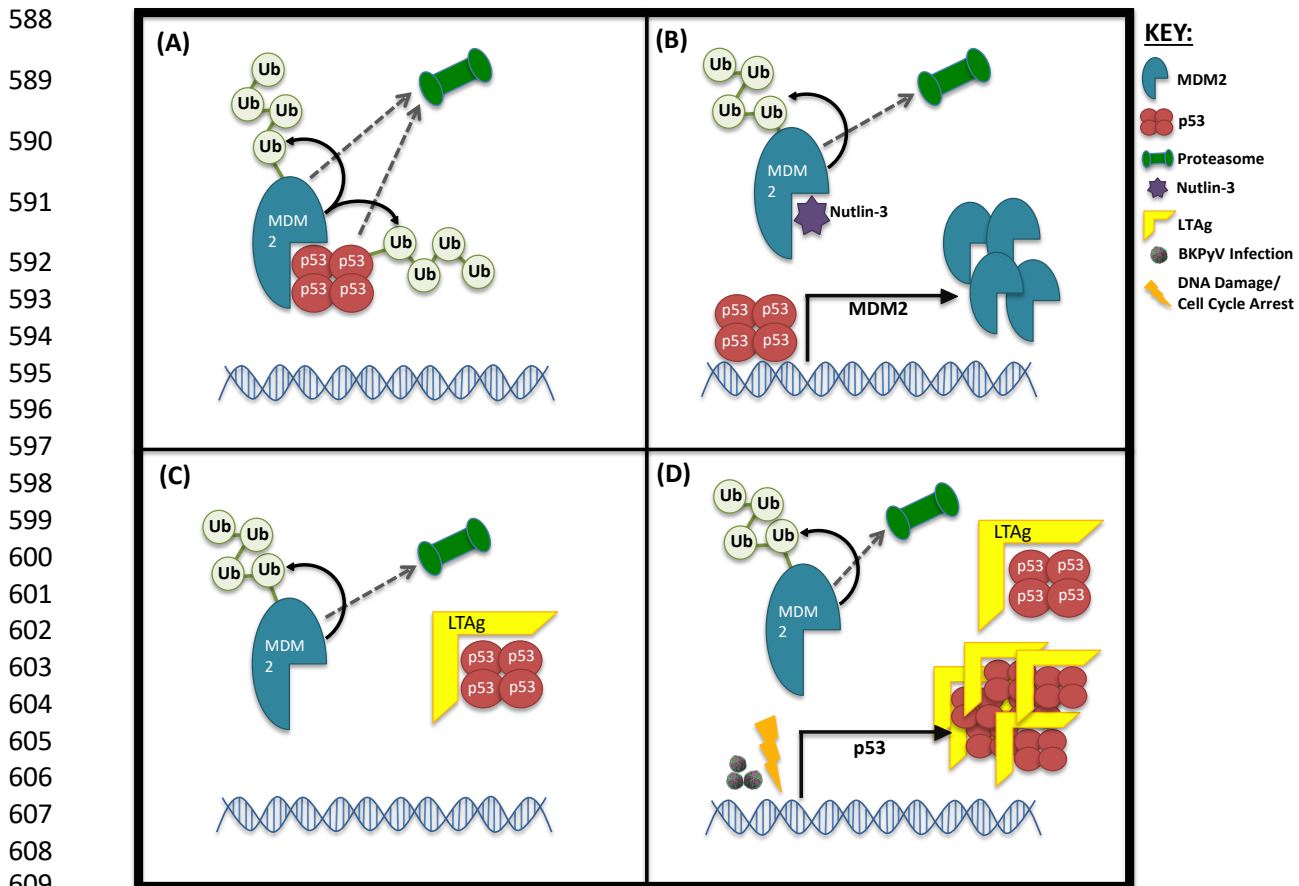

611 **Figure 9. Proposed mechanism of interplay between MDM2 and p53 levels in the presence of LTAg**

612 (A) Untreated cells.

613 (B) Uninfected, untransfected cells inhibited with Nutlin-3.

614 (C) Cells expressing LTAg in the absence of infection.

615 (D) Cells BkPyV infected, or cells expressing LTAg combined with cell cycle arrest/DNA damage.

616

617 Polyomaviruses have a well-established capacity to drive cells into S-phase by overriding the G1/S  
 618 checkpoint via the activity of LTAg. It is therefore unsurprising that inhibition of CDK4 and 6 has  
 619 little-to-no effect on the ability of BkPyV to drive cell cycle progression or to replicate. CDK4 and  
 620 6, in complex with cyclin D, are normally responsible for phosphorylation of Rb and release of E2F  
 621 proteins allowing passage through the G1/S checkpoint (Chellappan et al. 1991). This is bypassed  
 622 through the binding of LTAg to Rb family proteins, releasing E2F proteins enabling S-phase entry  
 623 that is unconstrained by upstream factors (Harris et al. 1996, Stubdal et al. 1997).

624 In stark contrast Roscovitine, a potent inhibitor of CDK1 and 2, by caused a global cell cycle arrest,  
 625 irrespective of BkPyV infection, and drastically reduced BkPyV replication. Similar effects of  
 626 Roscovitine on polyomavirus replication have been previously been attributed to inhibition of CDK1  
 627 activity alone (Orba et al. 2008). However, our data suggests the effect of Roscovitine are more



628 likely due to inhibition of CDK2 activity, or the combination of inhibiting both CDK1 and 2.  
629 Inhibition of both these cyclin dependent kinases causes a rather global block to cell cycle  
630 progression; CDK2 is active in both late G1 and S phase, while CDK1 is active in G2 and M phase  
631 (Obaya and Sedivy 2002). CDK2 activity is required immediately after G1 checkpoint clearance and  
632 beyond, and so the primary cause of BKPyV inhibition by Roscovitine could be due to a failure to  
633 activate S-phase proteins required for viral genome synthesis and consequent protein expression.

634 Somewhat more intriguing is the effect of CDK1-specific inhibition on BKPyV infection; RO-3306  
635 caused significant reductions in viral DNA synthesis and infectious virus assembly. This was  
636 surprising because CDK1 activity is normally important for the transition through G2 and into M-  
637 phase, and so inhibition of CDK1 would not be expected to inhibit progression through S-phase and  
638 thus viral DNA replication. Whether CDK1 activity is required directly or indirectly to enhance  
639 DNA synthesis or other S-phase activities required for BKPyV genome replication, or the process  
640 of virion assembly, remains to be determined.

641 Moreover, our data have demonstrated that BKPyV infection of renourinary epithelial cells does not  
642 appear to cause the induction of antiviral responses in agreement with published transcriptome data  
643 of RPTE cells (An et al. 2019). Both RPTE and HU cells express the appropriate receptors,  
644 signalling pathways and transcription factors associated with sensing and responding to DNA  
645 viruses, such as cGAS (MB21D1), IFI16, STING (TMEM173), NF $\kappa$ B, and IRF3, which were  
646 readily detected in our mass spectrometry analysis (**Table S1**). RPTE cells are quite capable of  
647 responding to foreign intracellular DNA or RNA, leading to phosphorylation and nuclear  
648 translocation of IRF3, and RPTE cells also robustly express antiviral genes in response to type-1  
649 interferon. However, we could not detect activation of these pathways even by three days after  
650 BKPyV infection: IRF3 remains unphosphorylated and cytoplasmic and no ISGs were induced.  
651 Furthermore, we have also shown that active BKPyV infection within the same cell does not prevent  
652 the phosphorylation and nuclear translocation of IRF3 in response to either cytoplasmic RNA or  
653 DNA. This suggests that BKPyV is not actively suppressing such antiviral responses, but rather  
654 prevents its own detection by pathogen recognition receptors. This evasion of detection may be due  
655 to a combination of having a small circular double stranded DNA genome that is associated with  
656 histones, thus appearing similar to open chromatin, and tightly regulated entry and egress  
657 mechanisms to prevent exposure of viral DNA in the cytoplasm. Whether an inability to sense and  
658 respond to BKPyV infection is partly due to the nature of epithelial cells in the renourinary systems  
659 and whether this contributes to the natural tropism of BKPyV for these tissue types will be  
660 interesting questions for future study.

661 In summary, we have generated extensive data sets on the protein expression profiles of primary  
662 epithelial cells of the kidney and bladder using advanced multiplexed proteomics and provided a  
663 detailed understanding of how infection by BKPyV modifies the protein expression profiles in these  
664 cells. This has uncovered a highly specific cell cycle arrest induced by virus infection and revealed  
665 the importance of this arrest for BKPyV replication, as well as uncovering details of p53-MDM2  
666 antagonism by this virus. Furthermore, our findings suggest a surprising ability of BKPyV to evade  
667 detection and activation of innate immune responses in cells that are natural sites of lytic virus  
668 infection *in vivo*.

669

## 670 **Materials and Methods**

### 671 **Cell lines, virus and primary antibodies.**

672 HU cells were grown in Urothelial Cell Medium enriched with Urothelial Cell Growth Supplement  
673 and penicillin/streptomycin solution (Caltag Medsystems). HU cells were used at passage 4-6 for all  
674 experiments. RPTE cells were grown in renal epithelial basal media enriched with REGM bullet kit  
675 (Lonza). RPTE cells were used at passage 6-7 for all experiments.

676 BKPyV (Dunlop strain) inserted into pGEM7Zf(+) vector (kindly provided by M. Imperiale,  
677 University of Michigan) was digested with BamHI, purified and re-ligated. Resultant BKPyV-  
678 Dunlop genome was transfected into a T150 flask of RPTE cells, one week later the flask was split  
679 into three T150 flasks of RPTE cells. After a period of up to four weeks virus was harvested by  
680 freeze thawing cells three times. Virus purification by sucrose cushion, followed by caesium  
681 chloride gradient and dialysis provided purified BKPyV stocks as described previously (Jiang et al.  
682 2009). Concentration and purity was assessed by FFU assay and coomassie gel stain respectively.

683 The primary antibodies used in this study were PAb597 against SV40 VP1 (kindly provided by W.  
684 Atwood, Brown University), P5G6 against BKPyV VP1 (kindly provided by D. Galloway, Fred  
685 Hutchinson Cancer Research Center), ab6160 against Tubulin (Abcam), ab32386 against Cyclin A2  
686 (Abcam), ab32053 against Cyclin B1 (Abcam), MA5-11472 against CDK1 (Thermo Scientific),  
687 ab207604 against Cyclin D2, ab1101 against p53 (Abcam), GTX116125 against Geminin  
688 (GeneTex), ab16895 against MDM2 (Abcam), 37849 against MX1 (Cell Signalling Technologies),  
689 2758 against ISG15 (Cell Signalling Technologies), PA3-848 against IFIT1 (ThermoFisher), 12604-  
690 1-AP against IFIT2 (ProteinTech), SAB1410691 against IFIT3 (Sigma Aldrich), 11904 against IRF3  
691 (Cell Signalling Technologies), ab76493 against IRF3 (phospho S386) (Abcam), ac-8023 against  
692 IFI16 (Santa Cruz), 11721 against BST2 (NIH AIDS Reagent Programme), ab53983 against SV40

693 VP2 + VP3 (Abcam), ab16879 against SV40 LTag (Abcam), and against BKPyV agnoprotein  
694 (rabbit polyclonal antibody generated against agnoprotein specific peptide).

### 695 **Cell infections and harvesting virus**

696 For viral infections RPTE or HU cells were infected with BKPyV at either MOI=5 for TMT and  
697 validation experiments, or MOI=3 or 0.5 for all other experiments, diluted in appropriate medium.  
698 At 1 hpi media was removed, cells washed twice with PBS and fresh medium was added. For TMT  
699 analysis, cells were harvested in TMT lysis buffer (6M Guanidine HCl, 50mM HEPES pH 8.5),  
700 vortexed extensively and incubated at room temperature for 10 min. Lysates were then sonicated at  
701 25 W for 30 s, followed by centrifugation at 21,000 g for 10 min, after which supernatant was  
702 transferred to a fresh tube. Centrifugation was repeated and supernatants snap-frozen in liquid  
703 nitrogen for further processing. For immunoblot, cells were harvested by centrifugation at 6,000 g  
704 after two PBS washes.

### 705 **Transfection**

706 RPTE cells were transfected with pcDNA3-LTag plasmid using TransIT-LT1 Transfection Reagent  
707 (Mirus) in Opti-MEM media according to the manufacturers protocol.

### 708 **Inhibitors**

709 For p53:MDM2 interaction inhibition experiments cells were treated at 2 hpi with Nutlin-3. Nutlin-  
710 3 (Sigma) was made up to 20mM in DMSO and used at 5 $\mu$ M. For cell cycle inhibition experiments  
711 cells were treated with inhibitors at 24 hpi. PD0332991 (Sigma) was made up to 5mM in dH<sub>2</sub>O and  
712 used at 1 $\mu$ M, Roscovitine (Sigma) was made up to 20mM in DMSO and used at 20 $\mu$ M and RO-  
713 3306 (Sigma) was made up to 20mM in DMSO and used at 5 $\mu$ M. Controls were subjected to  
714 treatment with an equivalent amount of DMSO at the greatest volume of any inhibitor used. Cells  
715 were harvested in 1mL media at 48 hpi and either pelleted by centrifugation at 6,000 g for use in  
716 western blot or qPCR, or frozen for assay by FFU. For analysis by flow cytometry cells were  
717 detached from wells by trypsin/EDTA treatment, centrifuged at 6,000 g, washed in PBS and fixed  
718 in 70% ice-cold ethanol.

### 719 **FFU and immunofluorescence microscopy**

720 Fluorescent focus unit (FFU) assays were used to determine the concentration of infectious virus in  
721 BKPyV purification or experimental samples. RPTE cells were infected with sample dilutions, fixed  
722 at 48 hpi and immunostained for VP1 expression as described in (Evans et al. 2015). Additionally,  
723 for **Figure 5C** infectious BKPyV levels of uninhibited conditions were arbitrarily set to 1 and

724 inhibited conditions corrected to this control, 7 independent experiments. A one sample t-test was  
725 conducted to give *p* values, standard deviation shown with error bars.

726 For immunofluorescence analysis, RPTE cells were fixed in 3% formaldehyde. Fixed cells were  
727 then permeabilised and quenched (50mM NH<sub>4</sub>Cl and 0.1% Triton X-100 in PBS), blocked in PGAT  
728 (0.2% gelatin, 0.01% Triton X-100, 0.02% NaN<sub>3</sub> in PBS) and stained with primary antibodies.  
729 Secondary antibodies used for immunofluorescence were Alexa Fluor 568 donkey anti-mouse or  
730 goat anti-IgG1 mouse and Alexa Fluor 488 donkey anti-rabbit or goat anti-IgG2a mouse. Coverslips  
731 were mounted using SlowFade Gold with DAPI (Invitrogen). Samples were imaged using a 63x oil  
732 immersion lens on an Olympus IX81 wide-field fluorescent microscope.

### 733 **Western blot**

734 RPTE cells were lysed by suspending in mRIPA (50mM Tris pH 7.5, 150mM NaCl, 1% Sodium  
735 Deoxycholate and 1% Triton X-100) supplemented with Complete Protease Inhibitors without  
736 EDTA (Roche). Cellular debris were removed by centrifugation at 17,000g. HU cells were lysed by  
737 suspending in HU cell Lysis Buffer (20mM HEPES pH 7.6, 250mM Sucrose, 2mM DTT, 2mM  
738 EDTA Na<sub>2</sub> and 2mM EGTA) supplemented with Complete Protease Inhibitors without EDTA,  
739 followed by sonication at 25W for 30 sec. Proteins were separated by SDS-PAGE electrophoresis  
740 and transferred to nitrocellulose membranes before blocking in 5% skimmed milk powder in PBS.

741 Following primary antibody binding, LI-COR IRDye680- (anti-mouse, anti-rabbit or anti-rat) or  
742 IRDye800-conjugated (anti-mouse or anti-rabbit) secondary antibodies were used. Membranes were  
743 then imaged on a LI-COR Odyssey Infrared Imaging system.

### 744 **Real-time PCR (qPCR)**

745 RPTE cell pellets were lysed in 200μL NDA Lysis Buffer (4M Guanidine Thiocyanate, 25mM Tris  
746 and 134mM β-mercaptoethanol) and incubated at 56°C for 10 min, after which an equal volume of  
747 100% ethanol was added. DNA was then bound to silica columns by centrifuging at 16,000× g for  
748 one min. Columns were washed with Buffer 1 (1M Guanidine Thiocyanate, 25mM Tris pH7 in 10%  
749 ethanol), and centrifuged, followed by a final wash in Buffer 2 (25mM Tris pH7 in 70% ethanol).  
750 DNA was eluted with nuclease free water by centrifugation at 16,000× g. Primers and probe for  
751 BKPyV genome were designed as described in (Evans et al. 2015). Human TNFα primers and probe  
752 were designed and obtained through TIB MOLBIOL (forward primer:  
753 AGGAACAGCACAGGCCTTAGTG; reverse primer: AAGACCCCTCCAGATAGATGG;  
754 Taqman probe: CCAGGATGTGGAGAGTGAACCGACATG). 300nM of each primer and 50nM  
755 of Taqman probe were used in each qPCR reaction, run on a Rotor-Gene (RG-3000, Corbett

756 Research) and subsequently analysed on Rotor-Gene software. BKPyV genome levels were  
757 corrected to the TNF $\alpha$  control for each sample, and uninhibited samples arbitrarily set to 1, 6  
758 independent experiments. A one sample t-test was conducted to give *p* values, standard deviation  
759 shown with error bars.

#### 760 **Flow cytometry**

761 Cellular DNA content was used as an indicator of cell cycle status. Cells were fixed in 70% ethanol  
762 for 30 mins, DNA was stained by resuspending each PBS washed cell pellet in 0.2mg RNase A and  
763 50 $\mu$ g propidium iodide in 1mL PBS and incubated at 37°C for 1 hr. Cells were then centrifuged at  
764 6,000 g, supernatant removed and resuspended in 500 $\mu$ L PBS. Cells were analysed by flow  
765 cytometry using BD FACSCantoII with BD FACSDiva Software (BD Biosciences) and further  
766 analysed using FlowJo v10.4.2 cell cycle analysis function. A minimum of 10,000 cells were  
767 collected for each sample, 3 independent experiments. Standard deviation error was calculated for  
768 each cell cycle status sample.

#### 769 **Whole cell lysate protein digestion**

770 Cells were washed twice with PBS, and 250  $\mu$ l lysis buffer added (6M Guanidine/50 mM HEPES  
771 pH 8.5). Cell lifters (Corning) were used to scrape cells in lysis buffer, which was removed to an  
772 eppendorf tube, vortexed extensively then sonicated. Cell debris was removed by centrifuging at  
773 21,000 g for 10 min twice. Dithiothreitol (DTT) was added to a final concentration of 5 mM and  
774 samples were incubated for 20 mins. Cysteines were alkylated with 14 mM iodoacetamide and  
775 incubated 20 min at room temperature in the dark. Excess iodoacetamide was quenched with DTT  
776 for 15 mins. Samples were diluted with 200 mM HEPES pH 8.5 to 1.5 M Guanidine followed by  
777 digestion at room temperature for 3 h with LysC protease at a 1:100 protease-to-protein ratio.  
778 Samples were further diluted with 200 mM HEPES pH 8.5 to 0.5 M Guanidine. Trypsin was then  
779 added at a 1:100 protease-to-protein ratio followed by overnight incubation at 37°C. The reaction  
780 was quenched with 5% formic acid, then centrifuged at 21,000 g for 10 min to remove undigested  
781 protein. Peptides were subjected to C18 solid-phase extraction (SPE, Sep-Pak, Waters) and vacuum-  
782 centrifuged to near-dryness.

#### 783 **Peptide labelling with tandem mass tags**

784 In preparation for TMT labelling, desalted peptides were dissolved in 200 mM HEPES pH 8.5.  
785 Peptide concentration was measured by microBCA (Pierce), and 25  $\mu$ g labelled with TMT reagent.  
786 TMT reagents (0.8 mg) were dissolved in 43  $\mu$ l anhydrous acetonitrile and 3  $\mu$ l added to peptide at  
787 a final acetonitrile concentration of 30% (v/v). Samples were labelled as follows. Experiment 1 (9-

788 plex); 126 – mock infection 12 hpi, 127N – mock infection 24 hpi, 127C – mock infection 48 hpi,  
789 128N – BKPyV infection 12 hpi, 128C – BKPyV infection 24 hpi, 129N – BKPyV irradiated – 48  
790 hpi, 129C – BKPyV irradiated 24 hpi, 130N BKPyV infection 48 hpi. Experiment 2 (10-plex); 126  
791 – HU cells mock infection 24 hpi, 127N – HU cells mock infection 72 hpi, 127C – HU cells BKPyV  
792 infection 24 hpi, 128N – HU cells BKPyV infection 48 hpi, 128C – HU cells BKPyV infection 72  
793 hpi, 129N – RPTE cells mock infection 24 hpi, 129C – RPTE cells mock infection 72 hpi, 130N –  
794 RPTE cells BKPyV infection 24 hpi, 130C – RPTE cells BKPyV infection 48 hpi, 131N – RPTE  
795 cells BKPyV infection 72 hpi. Following incubation at room temperature for 1 h, the reaction was  
796 quenched with hydroxylamine to a final concentration of 0.3% (v/v). TMT-labelled samples were  
797 combined at a 1:1:1:1:1:1:1:1:1 ratio (experiment 1) and 1:1:1:1:1:1:1:1:1 ratio (experiment 2).  
798 The sample was vacuum-centrifuged to near dryness and subjected to C18 SPE (Sep-Pak, Waters).  
799 An unfractionated singleshot was initially analysed to ensure similar peptide loading across each  
800 TMT channel, to avoid the need for excessive electronic normalization. Quantities of each TMT  
801 labelled sample were adjusted prior to high pH reversed-phase (HpRP) so that normalisation factors  
802 were >0.67 and <1.5. Normalisation is discussed in ‘Data Analysis’, and fractionation is discussed  
803 below.

#### 804 **Offline HpRP fractionation**

805 TMT-labelled tryptic peptides were subjected to HpRP fractionation using an Ultimate 3000 RSLC  
806 UHPLC system (Thermo Fisher Scientific) equipped with a 2.1 mm internal diameter (ID) x 25 cm  
807 long, 1.7 µm particle Kinetix Evo C18 column (Phenomenex). Mobile phase consisted of A: 3%  
808 acetonitrile (MeCN), B: MeCN and C: 200 mM ammonium formate pH 10. Isocratic conditions  
809 were 90% A / 10% C, and C was maintained at 10% throughout the gradient elution. Separations  
810 were conducted at 45°C. Samples were loaded at 200 µl/minute for 5 minutes. The flow rate was  
811 then increased to 400 µl/minute over 5 minutes, after which the gradient elution proceed as follows:  
812 0-19% B over 10 minutes, 19-34% B over 14.25 minutes, 34-50% B over 8.75 minutes, followed  
813 by a 10 minutes wash at 90% B. UV absorbance was monitored at 280 nm and 15 s fractions were  
814 collected into 96 well microplates using the integrated fraction collector. Fractions were recombined  
815 orthogonally in a checkerboard fashion, combining alternate wells from each column of the plate  
816 into a single fraction, and commencing combination of adjacent fractions in alternating rows. Wells  
817 prior to the start or after the stop of elution of peptide-rich fractions, as identified from the UV trace,  
818 were excluded. This yielded two sets of 12 combined fractions, A and B, which were dried in a  
819 vacuum centrifuge and resuspended in 10 µl MS solvent (4% MeCN / 5% formic acid) prior to LC-  
820 MS3. 11 set ‘A’ fractions were used for experiment 1 and 10 set ‘A’ fractions were used for  
821 experiment 2.



## 822 **LC-MS3**

823 Mass spectrometry data was acquired using an Orbitrap Lumos (Thermo Fisher Scientific, San Jose,  
824 CA). An Ultimate 3000 RSLC nano UHPLC equipped with a 300  $\mu\text{m}$  ID x 5 mm Acclaim PepMap  
825  $\mu$ -Precolumn (Thermo Fisher Scientific) and a 75  $\mu\text{m}$  ID x 50 cm 2.1  $\mu\text{m}$  particle Acclaim PepMap  
826 RSLC analytical column was used.

827 Loading solvent was 0.1% formic acid (FA), analytical solvent A: 0.1% FA and B: 80% MeCN +  
828 0.1% FA. All separations were carried out at 55°C. Samples were loaded at 5  $\mu\text{L}/\text{minute}$  for 5  
829 minutes in loading solvent before beginning the analytical gradient. The following gradient was  
830 used: 3-7% B over 3 minutes, 7-37% B over 173 minutes, followed by a 4 minute wash at 95% B  
831 and equilibration at 3% B for 15 minutes. Each analysis used a MultiNotch MS3-based TMT method  
832 (McAlister et al. 2012, McAlister et al. 2014). The following settings were used Th, 120,000  
833 Resolution,  $2 \times 10^5$  automatic gain control (AGC) target, 50 ms maximum injection time. MS2:  
834 Quadrupole isolation at an isolation width of  $m/z$  0.7, CID fragmentation (normalised collision  
835 energy (NCE) 35) with ion trap scanning in turbo mode from  $m/z$  120,  $1.5 \times 10^4$  AGC target, 120 ms  
836 maximum injection time. MS3: In Synchronous Precursor Selection mode the top 6 MS2 ions were  
837 selected for HCD fragmentation (NCE 65) and scanned in the Orbitrap at 60,000 resolution with an  
838 AGC target of  $1 \times 10^5$  and a maximum accumulation time of 150 ms. Ions were not accumulated for  
839 all parallelisable time. The entire MS/MS/MS cycle had a target time of 3 s. Dynamic exclusion was  
840 set to  $\pm 10$  ppm for 70 s. MS2 fragmentation was triggered on precursors  $5 \times 10^3$  counts and above.

## 841 **Data analysis**

842 In the following description, we list the first report in the literature for each relevant algorithm. Mass  
843 spectra were processed using a Sequest-based software pipeline for quantitative proteomics,  
844 “MassPike”, through a collaborative arrangement with Professor Steve Gygi’s laboratory at Harvard  
845 Medical School. MS spectra were converted to mzXML using an extractor built upon Thermo  
846 Fisher’s RAW File Reader library (version 4.0.26). In this extractor, the standard mzxml format has  
847 been augmented with additional custom fields that are specific to ion trap and Orbitrap mass  
848 spectrometry and essential for TMT quantitation. These additional fields include ion injection times  
849 for each scan, Fourier Transform-derived baseline and noise values calculated for every Orbitrap  
850 scan, isolation widths for each scan type, scan event numbers, and elapsed scan times. This software  
851 is a component of the MassPike software platform and is licensed by Harvard Medical School.

852 A combined database was constructed from (a) the human Uniprot database (4th February 2014),  
853 (b) the BK polyomavirus database (6th October, 2014). The combined database was concatenated  
854 with a reverse database composed of all protein sequences in reversed order. Searches were

855 performed using a 20 ppm precursor ion tolerance (Haas et al. 2006). Product ion tolerance was set  
856 to 0.03 Th. TMT tags on lysine residues and peptide N termini (229.162932 Da) and  
857 carbamidomethylation of cysteine residues (57.02146 Da) were set as static modifications, while  
858 oxidation of methionine residues (15.99492 Da) was set as a variable modification.

859 To control the fraction of erroneous protein identifications, a target-decoy strategy was employed  
860 (Elias and Gygi 2007, Elias and Gygi 2010). Peptide spectral matches (PSMs) were filtered to an  
861 initial peptide-level false discovery rate (FDR) of 1% with subsequent filtering to attain a final  
862 protein-level FDR of 1% (Kim et al. 2011, Wu et al. 2011). PSM filtering was performed using a  
863 linear discriminant analysis, as described previously (Huttlin et al. 2010). This distinguishes correct  
864 from incorrect peptide IDs in a manner analogous to the widely used Percolator algorithm (Kall et  
865 al. 2007), though employing a distinct machine learning algorithm. The following parameters were  
866 considered: XCorr,  $\Delta C_n$ , missed cleavages, peptide length, charge state, and precursor mass  
867 accuracy. Protein assembly was guided by principles of parsimony to produce the smallest set of  
868 proteins necessary to account for all observed peptides (Huttlin et al. 2010).

869 Proteins were quantified by summing TMT reporter ion counts across all matching peptide-spectral  
870 matches using "MassPike", as described previously (McAlister et al. 2012, McAlister et al. 2014).  
871 Briefly, a 0.003 Th window around the theoretical m/z of each reporter ion (126, 127n, 127c, 128n,  
872 128c, 129n, 129c, 130n, 130c, 131n, 131c) was scanned for ions, and the maximum intensity nearest  
873 to the theoretical m/z was used. The primary determinant of quantitation quality is the number of  
874 TMT reporter ions detected in each MS3 spectrum, which is directly proportional to the signal-to-  
875 noise (S:N) ratio observed for each ion (Makarov and Denisov 2009). Conservatively, every  
876 individual peptide used for quantitation was required to contribute sufficient TMT reporter ions  
877 (minimum of ~1250 per spectrum) so that each on its own could be expected to provide a  
878 representative picture of relative protein abundance (McAlister et al. 2012). An isolation specificity  
879 filter was additionally employed to minimise peptide co-isolation (Ting et al. 2011). Peptide-spectral  
880 matches with poor quality MS3 spectra (more than 9 TMT channels missing and/or a combined S:N  
881 ratio of less than 250 across all TMT reporter ions) or no MS3 spectra at all were excluded from  
882 quantitation. Peptides meeting the stated criteria for reliable quantitation were then summed by  
883 parent protein, in effect weighting the contributions of individual peptides to the total protein signal  
884 based on their individual TMT reporter ion yields. Protein quantitation values were exported for  
885 further analysis in Excel.

886 For protein quantitation, reverse and contaminant proteins were removed, then each reporter ion  
887 channel was summed across all quantified proteins and normalised assuming equal protein loading  
888 across all channels. For further analysis and display in figures, fractional TMT signals were used



889 (i.e. reporting the fraction of maximal signal observed for each protein in each TMT channel, rather  
890 than the absolute normalized signal intensity). This effectively corrected for differences in the  
891 numbers of peptides observed per protein. For all TMT experiments, normalised S:N values are  
892 presented in Table S1 ('Data' worksheet).

893 Hierarchical centroid clustering based on uncentered Pearson correlation, and k-means clustering  
894 were performed using Cluster 3.0 (Stanford University) and visualised using Java Treeview  
895 (<http://jtreeview.sourceforge.net>) unless otherwise noted.

896

### 897 **Author Contributions**

898 L.G.C., R.A. and C.T.R.D. acquired and analysed the experimental data. L.G.C., C.T.R.D., P.J.L.,  
899 M.P.W. and C.M.C. conceived and designed the experiments, interpreted the data and contributed  
900 to writing the manuscript. M.P.W. and C.M.C. supervised the project.

901

### 902 **Competing Interests**

903 None of the authors have competing interests.

904

### 905 **Acknowledgments**

906 This work was supported by an Isaac Newton Trust / Wellcome Trust ISSF award to C.M.C., a  
907 Biotechnology and Biological Sciences Research Council grant (BB/M021424/1) to C.M.C., a  
908 Medical Research Council funded PhD studentship to L.G.C. and a Wellcome Trust Senior Clinical  
909 Research Fellowship (108070/Z/15/Z) to M.P.W.

910

911 **References**

- 912 Abend, J. R., Low, J. A. and Imperiale, M. J. (2010) 'Global effects of BKV infection on gene expression in  
913 human primary kidney epithelial cells', *Virology*, 397(1), 73-79.
- 914  
915 An, P., Robles, M. T. S., Duray, A. M., Cantalupo, P. G. and Pipas, J. M. (2019) 'Human polyomavirus BKV  
916 infection of endothelial cells results in interferon pathway induction and persistence', *Plos*  
917 *Pathogens*, 15(1).
- 918  
919 Arthur, R. R., Shah, K. V., Baust, S. J., Santos, G. W. and Saral, R. (1986) 'ASSOCIATION OF BK VIRURIA WITH  
920 HEMORRHAGIC CYSTITIS IN RECIPIENTS OF BONE-MARROW TRANSPLANTS', *New England Journal*  
921 *of Medicine*, 315(4), 230-234.
- 922  
923 Assetta, B., De Cecco, M., O'Hara, B. and Atwood, W. J. (2016) 'JC Polyomavirus Infection of Primary  
924 Human Renal Epithelial Cells Is Controlled by a Type I IFN-Induced Response', *Mbio*, 7(4).
- 925  
926 Barak, Y., Juven, T., Haffner, R. and Oren, M. (1993) 'MDM2 EXPRESSION IS INDUCED BY WILD TYPE-P53  
927 ACTIVITY', *Embo Journal*, 12(2), 461-468.
- 928  
929 Boehme, K. A. and Blattner, C. (2009) 'Regulation of p53-insights into a complex process', *Critical Reviews*  
930 *in Biochemistry and Molecular Biology*, 44(6), 367-392.
- 931  
932 Chellappan, S. P., Hiebert, S., Mudryj, M., Horowitz, J. M. and Nevins, J. R. (1991) 'THE E2F TRANSCRIPTION  
933 FACTOR IS A CELLULAR TARGET FOR THE RB PROTEIN', *Cell*, 65(6), 1053-1061.
- 934  
935 Cox, J. and Mann, M. (2008) 'MaxQuant enables high peptide identification rates, individualized p.p.b.-  
936 range mass accuracies and proteome-wide protein quantification', *Nature Biotechnology*, 26(12),  
937 1367-1372.
- 938  
939 Elias, J. E. and Gygi, S. P. (2007) 'Target-decoy search strategy for increased confidence in large-scale  
940 protein identifications by mass spectrometry', *Nature Methods*, 4(3), 207-214.
- 941  
942 Elias, J. E. and Gygi, S. R. (2010) 'Target-Decoy Search Strategy for Mass Spectrometry-Based Proteomics',  
943 *Proteome Bioinformatics*, 604, 55-71.
- 944  
945 Evans, G. L., Caller, L. G., Foster, V. and Crump, C. M. (2015) 'Anion homeostasis is important for non-lytic  
946 release of BK polyomavirus from infected cells', *Open Biology*, 5(8).
- 947  
948 Gardner, S. D., Field, A. M., Coleman, D. V. and Hulme, B. (1971) 'NEW HUMAN PAPOVAVIRUS (BK)  
949 ISOLATED FROM URINE AFTER RENAL TRANSPLANTATION', *Lancet*, 1(7712), 1253-&.
- 950  
951 Grinde, B., Gayorfar, M. and Rinaldo, C. H. (2007) 'Impact of a polyomavirus (BKV) infection on mRNA  
952 expression in human endothelial cells', *Virus Research*, 123(1), 86-94.
- 953

- 954 Haas, W., Faherty, B. K., Gerber, S. A., Elias, J. E., Beausoleil, S. A., Bakalarski, C. E., Li, X., Villen, J. and Gygi,  
955 S. P. (2006) 'Optimization and use of peptide mass measurement accuracy in shotgun proteomics',  
956 *Molecular & Cellular Proteomics*, 5(7), 1326-1337.
- 957
- 958 Harris, K. F., Christensen, J. B. and Imperiale, M. J. (1996) 'BK virus large T antigen: Interactions with the  
959 retinoblastoma family of tumor suppressor proteins and on cellular growth control', *Journal of*  
960 *Virology*, 70(4), 2378-2386.
- 961
- 962 Hesbacher, S., Pfitzer, L., Wiedorfer, K., Angermeyer, S., Borst, A., Haferkamp, S., Scholz, C. J., Wobser, M.,  
963 Schrama, D. and Houben, R. (2016) 'RB1 is the crucial target of the Merkel cell polyomavirus Large  
964 T antigen in Merkel cell carcinoma cells', *Oncotarget*, 7(22), 32956-32968.
- 965
- 966 Hornikova, L., Fraiberk, M., Man, P., Janovec, V. and Forstova, J. (2017) 'VP1, the major capsid protein of  
967 the mouse polyomavirus, binds microtubules, promotes their acetylation and blocks the host cell  
968 cycle', *Febs Journal*, 284(2), 301-323.
- 969
- 970 Huang, D. W., Sherman, B. T. and Lempicki, R. A. (2009) 'Systematic and integrative analysis of large gene  
971 lists using DAVID bioinformatics resources', *Nature Protocols*, 4(1), 44-57.
- 972
- 973 Huang, G., Wu, L. W., Yang, S. C., Fei, J. G., Deng, S. X., Li, J., Chen, G. D., Fu, Q., Deng, R. H., Qiu, J., Wang,  
974 C. X. and Chen, L. Z. (2015) 'Factors Influencing Graft Outcomes Following Diagnosis of  
975 Polyomavirus - Associated Nephropathy after Renal Transplantation', *PLoS One*, 10(11).
- 976
- 977 Huttlin, E. L., Jedrychowski, M. P., Elias, J. E., Goswami, T., Rad, R., Beausoleil, S. A., Villen, J., Haas, W.,  
978 Sowa, M. E. and Gygi, S. P. (2010) 'A Tissue-Specific Atlas of Mouse Protein Phosphorylation and  
979 Expression', *Cell*, 143(7), 1174-1189.
- 980
- 981 Jiang, M. X., Abend, J. R., Tsai, B. and Imperiale, M. J. (2009) 'Early Events during BK Virus Entry and  
982 Disassembly', *Journal of Virology*, 83(3), 1350-1358.
- 983
- 984 Jiang, M. X., Zhao, L. B., Gamez, M. and Imperiale, M. J. (2012) 'Roles of ATM and ATR-Mediated DNA  
985 Damage Responses during Lytic BK Polyomavirus Infection', *Plos Pathogens*, 8(8).
- 986
- 987 Justice, J. L., Verhalen, B., Kumar, R., Lefkowitz, E. J., Imperiale, M. J. and Jiang, M. X. (2015) 'Quantitative  
988 Proteomic Analysis of Enriched Nuclear Fractions from BK Polyomavirus-Infected Primary Renal  
989 Proximal Tubule Epithelial Cells', *Journal of Proteome Research*, 14(10), 4413-4424.
- 990
- 991 Kall, L., Canterbury, J. D., Weston, J., Noble, W. S. and MacCoss, M. J. (2007) 'Semi-supervised learning for  
992 peptide identification from shotgun proteomics datasets', *Nature Methods*, 4(11), 923-925.
- 993
- 994 Kim, W., Bennett, E. J., Huttlin, E. L., Guo, A., Li, J., Possemato, A., Sowa, M. E., Rad, R., Rush, J., Comb, M.  
995 J., Harper, J. W. and Gygi, S. P. (2011) 'Systematic and Quantitative Assessment of the Ubiquitin-  
996 Modified Proteome', *Molecular Cell*, 44(2), 325-340.
- 997

- 998 Lileystrom, W., Klein, M. G., Zhang, R. G., Joachimiak, A. and Chen, X. J. S. (2006) 'Crystal structure of SV40  
999 large T-antigen bound to p53: interplay between a viral oncoprotein and a cellular tumor  
1000 suppressor', *Genes & Development*, 20(17), 2373-2382.
- 1001  
1002 Makarov, A. and Denisov, E. (2009) 'Dynamics of Ions of Intact Proteins in the Orbitrap Mass Analyzer',  
1003 *Journal of the American Society for Mass Spectrometry*, 20(8), 1486-1495.
- 1004  
1005 McAlister, G. C., Huttlin, E. L., Haas, W., Ting, L., Jedrychowski, M. P., Rogers, J. C., Kuhn, K., Pike, I.,  
1006 Grothe, R. A., Blethrow, J. D. and Gygi, S. P. (2012) 'Increasing the Multiplexing Capacity of TMTs  
1007 Using Reporter Ion Isotopologues with Isobaric Masses', *Analytical Chemistry*, 84(17), 7469-7478.
- 1008  
1009 McAlister, G. C., Nusinow, D. P., Jedrychowski, M. P., Wuehr, M., Huttlin, E. L., Erickson, B. K., Rad, R.,  
1010 Haas, W. and Gygi, S. P. (2014) 'MultiNotch MS3 Enables Accurate, Sensitive, and Multiplexed  
1011 Detection of Differential Expression across Cancer Cell Line Proteomes', *Analytical Chemistry*,  
1012 86(14), 7150-7158.
- 1013  
1014 Obaya, A. J. and Sedivy, J. M. (2002) 'Regulation of cyclin-Cdk activity in mammalian cells', *Cellular and  
1015 Molecular Life Sciences*, 59(1), 126-142.
- 1016  
1017 Orba, Y., Sunden, Y., Suzuki, T., Nagashima, K., Kimura, T., Tanaka, S. and Sawa, H. (2008) 'Pharmacological  
1018 cdk inhibitor R-Roscovitin suppresses JC virus proliferation', *Virology*, 370(1), 173-183.
- 1019  
1020 Orba, Y., Suzuki, T., Makino, Y., Kubota, K., Tanaka, S., Kimura, T. and Sawa, H. (2010) 'Large T Antigen  
1021 Promotes JC Virus Replication in G(2)-arrested Cells by Inducing ATM- and ATR-mediated G(2)  
1022 Checkpoint Signaling', *Journal of Biological Chemistry*, 285(2), 1544-1554.
- 1023  
1024 Pallas, D. C., Shahrik, L. K., Martin, B. L., Jaspers, S., Miller, T. B., Brautigan, D. L. and Roberts, T. M. (1990)  
1025 'POLYOMA SMALL AND MIDDLE T-ANTIGENS AND SV40 SMALL T-ANTIGEN FORM STABLE  
1026 COMPLEXES WITH PROTEIN PHOSPHATASE-2A', *Cell*, 60(1), 167-176.
- 1027  
1028 Panou, M.-M., Prescott, E. L., Hurdiss, D. L., Swinscoe, G., Hollinshead, M., Caller, L. G., Morgan, E. L.,  
1029 Carlisle, L., Mueller, M., Antoni, M., Kealy, D., Ranson, N. A., Crump, C. M. and Macdonald, A.  
1030 (2018) 'Agnoprotein Is an Essential Egress Factor during BK Polyomavirus Infection', *International  
1031 Journal of Molecular Sciences*, 19(3).
- 1032  
1033 Papadimitriou, J. C., Randhawa, P., Rinaldo, C. H., Drachenberg, C. B., Alexiev, B. and Hirsch, H. H. (2016)  
1034 'BK Polyomavirus Infection and Renourinary Tumorigenesis', *American Journal of Transplantation*,  
1035 16(2), 398-406.
- 1036  
1037 Pines, J. and Hunter, T. (1991) 'HUMAN CYCLIN-A AND CYCLIN-B1 ARE DIFFERENTIALLY LOCATED IN THE  
1038 CELL AND UNDERGO CELL-CYCLE DEPENDENT NUCLEAR TRANSPORT', *Journal of Cell Biology*,  
1039 115(1), 1-17.
- 1040  
1041 Porras, A., Gaillard, S. and Rundell, K. (1999) 'The simian virus 40 small-t and large-T antigens jointly  
1042 regulate cell cycle reentry in human fibroblasts', *Journal of Virology*, 73(4), 3102-3107.
- 1043

- 1044 Rundell, K. and Parakati, R. (2001) 'The role of the SV40ST antigen in cell growth promotion and  
1045 transformation', *Seminars in Cancer Biology*, 11(1), 5-13.
- 1046
- 1047 Saribas, A. S., Coric, P., Hamazaspayan, A., Davis, W., Axman, R., White, M. K., Abou-Gharbia, M., Childers,  
1048 W., Condra, J. H., Bouaziz, S. and Safak, M. (2016) 'Emerging From the Unknown: Structural and  
1049 Functional Features of Agnoprotein of Polyomaviruses', *Journal of Cellular Physiology*, 231(10),  
1050 2115-2127.
- 1051
- 1052 Scheidtmann, K. H., Mumby, M. C., Rundell, K. and Walter, G. (1991) 'DEPHOSPHORYLATION OF SIMIAN  
1053 VIRUS-40 LARGE-T ANTIGEN AND P53 PROTEIN BY PROTEIN PHOSPHATASE-2A - INHIBITION BY  
1054 SMALL-T ANTIGEN', *Molecular and Cellular Biology*, 11(4), 1996-2003.
- 1055
- 1056 Sheppard, H. M., Corneillie, S. I., Espiritu, C., Gatti, A. and Liu, X. A. (1999) 'New insights into the  
1057 mechanism of inhibition of p53 by simian virus 40 large T antigen', *Molecular and Cellular Biology*,  
1058 19(4), 2746-2753.
- 1059
- 1060 Stubdal, H., Zalvide, J., Campbell, K. S., Schweitzer, C., Roberts, T. M. and DeCaprio, J. A. (1997)  
1061 'Inactivation of pRB-related proteins p130 and p107 mediated by the J domain of simian virus 40  
1062 large T antigen', *Molecular and Cellular Biology*, 17(9), 4979-4990.
- 1063
- 1064 Ting, L., Rad, R., Gygi, S. P. and Haas, W. (2011) 'MS3 eliminates ratio distortion in isobaric multiplexed  
1065 quantitative proteomics', *Nature Methods*, 8(11), 937-940.
- 1066
- 1067 Vassilev, L. T., Vu, B. T., Graves, B., Carvajal, D., Podlaski, F., Filipovic, Z., Kong, N., Kammlott, U., Lukacs, C.,  
1068 Klein, C., Fotouhi, N. and Liu, E. A. (2004) 'In vivo activation of the p53 pathway by small-molecule  
1069 antagonists of MDM2', *Science*, 303(5659), 844-848.
- 1070
- 1071 Verhalen, B., Justice, J. L., Imperiale, M. J. and Jiang, M. X. (2015) 'Viral DNA Replication-Dependent DNA  
1072 Damage Response Activation during BK Polyomavirus Infection', *Journal of Virology*, 89(9), 5032-  
1073 5039.
- 1074
- 1075 Viscidi, R. P., Rollison, D. E., Sondak, V. K., Silver, B., Messina, J. L., Giuliano, A. R., Fulp, W., Ajidahun, A.  
1076 and Rivanera, D. (2011) 'Age-Specific Seroprevalence of Merkel Cell Polyomavirus, BK Virus, and JC  
1077 Virus', *Clinical and Vaccine Immunology*, 18(10), 1737-1743.
- 1078
- 1079 Weekes, M. P., Tomasec, P., Huttlin, E. L., Fielding, C. A., Nusinow, D., Stanton, R. J., Wang, E. C. Y.,  
1080 Aicheler, R., Murrell, I., Wilkinson, G. W. G., Lehner, P. J. and Gygi, S. P. (2014) 'Quantitative  
1081 Temporal Viromics: An Approach to Investigate Host-Pathogen Interaction', *Cell*, 157(6), 1460-  
1082 1472.
- 1083
- 1084 Wei, C. L., Wu, Q., Vega, V. B., Chiu, K. P., Ng, P., Zhang, T., Shahab, A., Yong, H. C., Fu, Y. T., Weng, Z. P.,  
1085 Liu, J. J., Zhao, X. D., Chew, J. L., Lee, Y. L., Kuznetsov, V. A., Sung, W. K., Miller, L. D., Lim, B., Liu, E.  
1086 T., Yu, Q., Ng, H. H. and Ruan, Y. J. (2006) 'A global map of p53 transcription-factor binding sites in  
1087 the human genome', *Cell*, 124(1), 207-219.
- 1088

1089 Wu, R., Dephoure, N., Haas, W., Huttlin, E. L., Zhai, B., Sowa, M. E. and Gygi, S. P. (2011) 'Correct  
1090 Interpretation of Comprehensive Phosphorylation Dynamics Requires Normalization by Protein  
1091 Expression Changes', *Molecular & Cellular Proteomics*, 10(8).

1092

1093 **Supplementary Data Table descriptions**

1094 **Table S1.** Interactive spreadsheet of all data in the manuscript. The “DATA” worksheet shows  
1095 minimally annotated protein data, with only formatting and normalisation modifying the raw data.  
1096 The “Plotter” worksheet enables generation of individual protein abundance changes for both viral  
1097 and human proteins over time from experiments 1 and 2. The total number of quantified peptides  
1098 and proteins from experiments 1 and 2 are shown in separate workbook sheets.

1099 **Table S2.** A list of all quantified proteins from experiments 1 and 2 that match the UniProt keywords  
1100 terms ‘Innate Immunity’ and ‘Antiviral Defense’ and their corresponding fold changes post-BKPyV  
1101 infection.

1102 **Table S3.** Proteins modulated during BK infection. All proteins downregulated or upregulated >2-  
1103 fold at any time point during the course of infection (compared to the average of the mock samples).  
1104 Results from experiments 1 and 2 are presented.

1105 **Table S4.** DAVID functional enrichment analysis from proteins upregulated or downregulated >2-  
1106 fold against a background of all proteins quantified. Only significant (Benjamini-Hochberg  
1107 corrected) clusters from experiments 1 and 2 are shown. There were no significant clusters amongst  
1108 proteins downregulated >2-fold in experiment 2.
